# Supplementary material
Source: MDPI journal article supplement (https://www.mdpi.com/2227-9717/7/5/310)
Supplement: s1 [file The input datasets and the forecasted ones.xlsx]

## Sheet: Datasets and Timestamps Jan-Nov
No.	Hour of the day	Day of the week	Day of the month	Month	The hourly consumption	The daily aggregated consumption
1	1	1	1	1	0.09792	2.55287
2	2	1	1	1	0.09797	2.55287
3	3	1	1	1	0.09894	2.55287
4	4	1	1	1	0.09898	2.55287
5	5	1	1	1	0.09991	2.55287
6	6	1	1	1	0.09898	2.55287
7	7	1	1	1	0.09888	2.55287
8	8	1	1	1	0.09292	2.55287
9	9	1	1	1	0.08755	2.55287
10	10	1	1	1	0.08772	2.55287
11	11	1	1	1	0.08585	2.55287
12	12	1	1	1	0.08484	2.55287
13	13	1	1	1	0.08686	2.55287
14	14	1	1	1	0.0867	2.55287
15	15	1	1	1	0.08652	2.55287
16	16	1	1	1	0.08858	2.55287
17	17	1	1	1	0.08787	2.55287
18	18	1	1	1	0.09996	2.55287
19	19	1	1	1	0.11716	2.55287
20	20	1	1	1	0.14214	2.55287
21	21	1	1	1	0.16463	2.55287
22	22	1	1	1	0.16564	2.55287
23	23	1	1	1	0.16171	2.55287
24	24	1	1	1	0.13464	2.55287
25	1	2	2	1	0.40392	10.7281
26	2	2	2	1	0.4233	10.7281
27	3	2	2	1	0.41412	10.7281
28	4	2	2	1	0.41509	10.7281
29	5	2	2	1	0.40273	10.7281
30	6	2	2	1	0.40188	10.7281
31	7	2	2	1	0.39474	10.7281
32	8	2	2	1	0.50367	10.7281
33	9	2	2	1	0.53856	10.7281
34	10	2	2	1	0.5562	10.7281
35	11	2	2	1	0.55311	10.7281
36	12	2	2	1	0.52318	10.7281
37	13	2	2	1	0.50882	10.7281
38	14	2	2	1	0.50803	10.7281
39	15	2	2	1	0.48379	10.7281
40	16	2	2	1	0.46556	10.7281
41	17	2	2	1	0.4233	10.7281
42	18	2	2	1	0.42521	10.7281
43	19	2	2	1	0.41915	10.7281
44	20	2	2	1	0.41616	10.7281
45	21	2	2	1	0.39346	10.7281
46	22	2	2	1	0.38522	10.7281
47	23	2	2	1	0.3811	10.7281
48	24	2	2	1	0.38784	10.7281
49	1	3	3	1	0.42126	10.9738
50	2	3	3	1	0.44339	10.9738
51	3	3	3	1	0.43834	10.9738
52	4	3	3	1	0.44268	10.9738
53	5	3	3	1	0.42723	10.9738
54	6	3	3	1	0.4386	10.9738
55	7	3	3	1	0.44064	10.9738
56	8	3	3	1	0.51603	10.9738
57	9	3	3	1	0.57732	10.9738
58	10	3	3	1	0.55752	10.9738
59	11	3	3	1	0.55348	10.9738
60	12	3	3	1	0.53429	10.9738
61	13	3	3	1	0.52736	10.9738
62	14	3	3	1	0.48076	10.9738
63	15	3	3	1	0.47838	10.9738
64	16	3	3	1	0.44137	10.9738
65	17	3	3	1	0.39474	10.9738
66	18	3	3	1	0.40376	10.9738
67	19	3	3	1	0.3838	10.9738
68	20	3	3	1	0.41514	10.9738
69	21	3	3	1	0.39895	10.9738
70	22	3	3	1	0.40698	10.9738
71	23	3	3	1	0.43157	10.9738
72	24	3	3	1	0.42024	10.9738
73	1	4	4	1	0.42539	12.3523
74	2	4	4	1	0.44339	12.3523
75	3	4	4	1	0.44187	12.3523
76	4	4	4	1	0.42848	12.3523
77	5	4	4	1	0.41004	12.3523
78	6	4	4	1	0.4017	12.3523
79	7	4	4	1	0.44805	12.3523
80	8	4	4	1	0.68701	12.3523
81	9	4	4	1	0.65199	12.3523
82	10	4	4	1	0.75276	12.3523
83	11	4	4	1	0.73326	12.3523
84	12	4	4	1	0.73124	12.3523
85	13	4	4	1	0.76092	12.3523
86	14	4	4	1	0.73831	12.3523
87	15	4	4	1	0.73848	12.3523
88	16	4	4	1	0.49572	12.3523
89	17	4	4	1	0.3672	12.3523
90	18	4	4	1	0.37492	12.3523
91	19	4	4	1	0.3811	12.3523
92	20	4	4	1	0.39552	12.3523
93	21	4	4	1	0.40479	12.3523
94	22	4	4	1	0.39758	12.3523
95	23	4	4	1	0.37492	12.3523
96	24	4	4	1	0.36764	12.3523
97	1	5	5	1	0.38831	9.83306
98	2	5	5	1	0.3876	9.83306
99	3	5	5	1	0.38481	9.83306
100	4	5	5	1	0.36865	9.83306
101	5	5	5	1	0.37183	9.83306
102	6	5	5	1	0.42333	9.83306
103	7	5	5	1	0.43044	9.83306
104	8	5	5	1	0.49234	9.83306
105	9	5	5	1	0.47689	9.83306
106	10	5	5	1	0.52015	9.83306
107	11	5	5	1	0.50676	9.83306
108	12	5	5	1	0.5047	9.83306
109	13	5	5	1	0.50286	9.83306
110	14	5	5	1	0.4747	9.83306
111	15	5	5	1	0.42319	9.83306
112	16	5	5	1	0.40494	9.83306
113	17	5	5	1	0.35451	9.83306
114	18	5	5	1	0.35226	9.83306
115	19	5	5	1	0.34402	9.83306
116	20	5	5	1	0.35947	9.83306
117	21	5	5	1	0.34643	9.83306
118	22	5	5	1	0.3468	9.83306
119	23	5	5	1	0.33229	9.83306
120	24	5	5	1	0.33578	9.83306
121	1	6	6	1	0.32232	7.28484
122	2	6	6	1	0.32825	7.28484
123	3	6	6	1	0.33936	7.28484
124	4	6	6	1	0.32623	7.28484
125	5	6	6	1	0.29376	7.28484
126	6	6	6	1	0.27371	7.28484
127	7	6	6	1	0.27913	7.28484
128	8	6	6	1	0.29088	7.28484
129	9	6	6	1	0.29767	7.28484
130	10	6	6	1	0.29593	7.28484
131	11	6	6	1	0.28078	7.28484
132	12	6	6	1	0.27438	7.28484
133	13	6	6	1	0.27744	7.28484
134	14	6	6	1	0.28356	7.28484
135	15	6	6	1	0.27707	7.28484
136	16	6	6	1	0.27438	7.28484
137	17	6	6	1	0.27169	7.28484
138	18	6	6	1	0.31415	7.28484
139	19	6	6	1	0.29973	7.28484
140	20	6	6	1	0.32334	7.28484
141	21	6	6	1	0.35329	7.28484
142	22	6	6	1	0.36006	7.28484
143	23	6	6	1	0.31916	7.28484
144	24	6	6	1	0.32857	7.28484
145	1	7	7	1	0.32754	7.64226
146	2	7	7	1	0.3519	7.64226
147	3	7	7	1	0.35638	7.64226
148	4	7	7	1	0.36924	7.64226
149	5	7	7	1	0.3535	7.64226
150	6	7	7	1	0.35249	7.64226
151	7	7	7	1	0.32651	7.64226
152	8	7	7	1	0.31926	7.64226
153	9	7	7	1	0.31621	7.64226
154	10	7	7	1	0.30702	7.64226
155	11	7	7	1	0.29795	7.64226
156	12	7	7	1	0.3009	7.64226
157	13	7	7	1	0.30488	7.64226
158	14	7	7	1	0.30385	7.64226
159	15	7	7	1	0.309	7.64226
160	16	7	7	1	0.30591	7.64226
161	17	7	7	1	0.30282	7.64226
162	18	7	7	1	0.28886	7.64226
163	19	7	7	1	0.2884	7.64226
164	20	7	7	1	0.30401	7.64226
165	21	7	7	1	0.30603	7.64226
166	22	7	7	1	0.31518	7.64226
167	23	7	7	1	0.31108	7.64226
168	24	7	7	1	0.32334	7.64226
169	1	1	8	1	0.33354	9.91941
170	2	1	8	1	0.33063	9.91941
171	3	1	8	1	0.33372	9.91941
172	4	1	8	1	0.32522	9.91941
173	5	1	8	1	0.32754	9.91941
174	6	1	8	1	0.33558	9.91941
175	7	1	8	1	0.34138	9.91941
176	8	1	8	1	0.44642	9.91941
177	9	1	8	1	0.49995	9.91941
178	10	1	8	1	0.49187	9.91941
179	11	1	8	1	0.48616	9.91941
180	12	1	8	1	0.48616	9.91941
181	13	1	8	1	0.47998	9.91941
182	14	1	8	1	0.47773	9.91941
183	15	1	8	1	0.47328	9.91941
184	16	1	8	1	0.43632	9.91941
185	17	1	8	1	0.42745	9.91941
186	18	1	8	1	0.43127	9.91941
187	19	1	8	1	0.39984	9.91941
188	20	1	8	1	0.42745	9.91941
189	21	1	8	1	0.41406	9.91941
190	22	1	8	1	0.40097	9.91941
191	23	1	8	1	0.3978	9.91941
192	24	1	8	1	0.41509	9.91941
193	1	2	9	1	0.42738	15.8727
194	2	2	9	1	0.43554	15.8727
195	3	2	9	1	0.44339	15.8727
196	4	2	9	1	0.41309	15.8727
197	5	2	9	1	0.36565	15.8727
198	6	2	9	1	0.42432	15.8727
199	7	2	9	1	0.5555	15.8727
200	8	2	9	1	0.77418	15.8727
201	9	2	9	1	0.83232	15.8727
202	10	2	9	1	0.8383	15.8727
203	11	2	9	1	0.83325	15.8727
204	12	2	9	1	0.81608	15.8727
205	13	2	9	1	0.8313	15.8727
206	14	2	9	1	0.77662	15.8727
207	15	2	9	1	0.74336	15.8727
208	16	2	9	1	0.70902	15.8727
209	17	2	9	1	0.69892	15.8727
210	18	2	9	1	0.71094	15.8727
211	19	2	9	1	0.72821	15.8727
212	20	2	9	1	0.71508	15.8727
213	21	2	9	1	0.71688	15.8727
214	22	2	9	1	0.69387	15.8727
215	23	2	9	1	0.6987	15.8727
216	24	2	9	1	0.69084	15.8727
217	1	3	10	1	0.69084	16.6246
218	2	3	10	1	0.71298	16.6246
219	3	3	10	1	0.69286	16.6246
220	4	3	10	1	0.71482	16.6246
221	5	3	10	1	0.69972	16.6246
222	6	3	10	1	0.71997	16.6246
223	7	3	10	1	0.71811	16.6246
224	8	3	10	1	0.7701	16.6246
225	9	3	10	1	0.8034	16.6246
226	10	3	10	1	0.7497	16.6246
227	11	3	10	1	0.7548	16.6246
228	12	3	10	1	0.71104	16.6246
229	13	3	10	1	0.72619	16.6246
230	14	3	10	1	0.70296	16.6246
231	15	3	10	1	0.71791	16.6246
232	16	3	10	1	0.67568	16.6246
233	17	3	10	1	0.65302	16.6246
234	18	3	10	1	0.64337	16.6246
235	19	3	10	1	0.63933	16.6246
236	20	3	10	1	0.67165	16.6246
237	21	3	10	1	0.70143	16.6246
238	22	3	10	1	0.67266	16.6246
239	23	3	10	1	0.64842	16.6246
240	24	3	10	1	0.43363	16.6246
241	1	4	11	1	0.34608	10.5827
242	2	4	11	1	0.35329	10.5827
243	3	4	11	1	0.34272	10.5827
244	4	4	11	1	0.36668	10.5827
245	5	4	11	1	0.33864	10.5827
246	6	4	11	1	0.33966	10.5827
247	7	4	11	1	0.34643	10.5827
248	8	4	11	1	0.54978	10.5827
249	9	4	11	1	0.77971	10.5827
250	10	4	11	1	0.73326	10.5827
251	11	4	11	1	0.73851	10.5827
252	12	4	11	1	0.721	10.5827
253	13	4	11	1	0.73027	10.5827
254	14	4	11	1	0.66198	10.5827
255	15	4	11	1	0.3737	10.5827
256	16	4	11	1	0.32334	10.5827
257	17	4	11	1	0.30098	10.5827
258	18	4	11	1	0.33354	10.5827
259	19	4	11	1	0.32522	10.5827
260	20	4	11	1	0.32232	10.5827
261	21	4	11	1	0.3162	10.5827
262	22	4	11	1	0.31824	10.5827
263	23	4	11	1	0.31003	10.5827
264	24	4	11	1	0.3111	10.5827
265	1	5	12	1	0.32033	9.10948
266	2	5	12	1	0.32926	9.10948
267	3	5	12	1	0.33456	9.10948
268	4	5	12	1	0.31827	9.10948
269	5	5	12	1	0.3009	9.10948
270	6	5	12	1	0.32342	9.10948
271	7	5	12	1	0.3502	9.10948
272	8	5	12	1	0.43672	9.10948
273	9	5	12	1	0.47792	9.10948
274	10	5	12	1	0.50161	9.10948
275	11	5	12	1	0.4747	9.10948
276	12	5	12	1	0.4848	9.10948
277	13	5	12	1	0.49337	9.10948
278	14	5	12	1	0.4692	9.10948
279	15	5	12	1	0.41208	9.10948
280	16	5	12	1	0.34542	9.10948
281	17	5	12	1	0.29896	9.10948
282	18	5	12	1	0.28785	9.10948
283	19	5	12	1	0.30076	9.10948
284	20	5	12	1	0.33475	9.10948
285	21	5	12	1	0.37976	9.10948
286	22	5	12	1	0.39449	9.10948
287	23	5	12	1	0.38213	9.10948
288	24	5	12	1	0.35802	9.10948
289	1	6	13	1	0.34402	8.06868
290	2	6	13	1	0.3914	8.06868
291	3	6	13	1	0.38658	8.06868
292	4	6	13	1	0.37332	8.06868
293	5	6	13	1	0.34946	8.06868
294	6	6	13	1	0.3535	8.06868
295	7	6	13	1	0.33027	8.06868
296	8	6	13	1	0.30805	8.06868
297	9	6	13	1	0.30805	8.06868
298	10	6	13	1	0.28987	8.06868
299	11	6	13	1	0.29886	8.06868
300	12	6	13	1	0.31621	8.06868
301	13	6	13	1	0.33229	8.06868
302	14	6	13	1	0.35329	8.06868
303	15	6	13	1	0.34884	8.06868
304	16	6	13	1	0.32436	8.06868
305	17	6	13	1	0.32857	8.06868
306	18	6	13	1	0.31724	8.06868
307	19	6	13	1	0.32033	8.06868
308	20	6	13	1	0.34374	8.06868
309	21	6	13	1	0.34476	8.06868
310	22	6	13	1	0.34917	8.06868
311	23	6	13	1	0.33633	8.06868
312	24	6	13	1	0.32017	8.06868
313	1	7	14	1	0.34068	7.49928
314	2	7	14	1	0.36764	7.49928
315	3	7	14	1	0.38522	7.49928
316	4	7	14	1	0.3502	7.49928
317	5	7	14	1	0.3502	7.49928
318	6	7	14	1	0.3399	7.49928
319	7	7	14	1	0.30401	7.49928
320	8	7	14	1	0.3111	7.49928
321	9	7	14	1	0.29973	7.49928
322	10	7	14	1	0.30797	7.49928
323	11	7	14	1	0.31827	7.49928
324	12	7	14	1	0.306	7.49928
325	13	7	14	1	0.30591	7.49928
326	14	7	14	1	0.29376	7.49928
327	15	7	14	1	0.29189	7.49928
328	16	7	14	1	0.29784	7.49928
329	17	7	14	1	0.29391	7.49928
330	18	7	14	1	0.29391	7.49928
331	19	7	14	1	0.28764	7.49928
332	20	7	14	1	0.29664	7.49928
333	21	7	14	1	0.29973	7.49928
334	22	7	14	1	0.29784	7.49928
335	23	7	14	1	0.28737	7.49928
336	24	7	14	1	0.27192	7.49928
337	1	1	15	1	0.28684	9.73027
338	2	1	15	1	0.30805	9.73027
339	3	1	15	1	0.31312	9.73027
340	4	1	15	1	0.30098	9.73027
341	5	1	15	1	0.30076	9.73027
342	6	1	15	1	0.29886	9.73027
343	7	1	15	1	0.31518	9.73027
344	8	1	15	1	0.40582	9.73027
345	9	1	15	1	0.46206	9.73027
346	10	1	15	1	0.49086	9.73027
347	11	1	15	1	0.50298	9.73027
348	12	1	15	1	0.48756	9.73027
349	13	1	15	1	0.49646	9.73027
350	14	1	15	1	0.49878	9.73027
351	15	1	15	1	0.47022	9.73027
352	16	1	15	1	0.43248	9.73027
353	17	1	15	1	0.41922	9.73027
354	18	1	15	1	0.41718	9.73027
355	19	1	15	1	0.42539	9.73027
356	20	1	15	1	0.42436	9.73027
357	21	1	15	1	0.404	9.73027
358	22	1	15	1	0.41208	9.73027
359	23	1	15	1	0.4131	9.73027
360	24	1	15	1	0.44393	9.73027
361	1	2	16	1	0.45732	16.6042
362	2	2	16	1	0.46763	16.6042
363	3	2	16	1	0.47571	16.6042
364	4	2	16	1	0.43935	16.6042
365	5	2	16	1	0.42942	16.6042
366	6	2	16	1	0.43044	16.6042
367	7	2	16	1	0.46144	16.6042
368	8	2	16	1	0.72316	16.6042
369	9	2	16	1	0.88786	16.6042
370	10	2	16	1	0.88128	16.6042
371	11	2	16	1	0.84234	16.6042
372	12	2	16	1	0.8466	16.6042
373	13	2	16	1	0.82517	16.6042
374	14	2	16	1	0.83842	16.6042
375	15	2	16	1	0.79487	16.6042
376	16	2	16	1	0.77214	16.6042
377	17	2	16	1	0.77164	16.6042
378	18	2	16	1	0.76838	16.6042
379	19	2	16	1	0.75808	16.6042
380	20	2	16	1	0.74256	16.6042
381	21	2	16	1	0.75952	16.6042
382	22	2	16	1	0.75911	16.6042
383	23	2	16	1	0.72924	16.6042
384	24	2	16	1	0.74256	16.6042
385	1	3	17	1	0.77456	18.3884
386	2	3	17	1	0.75447	18.3884
387	3	3	17	1	0.76154	18.3884
388	4	3	17	1	0.78589	18.3884
389	5	3	17	1	0.75684	18.3884
390	6	3	17	1	0.7519	18.3884
391	7	3	17	1	0.76323	18.3884
392	8	3	17	1	0.82314	18.3884
393	9	3	17	1	0.83628	18.3884
394	10	3	17	1	0.82416	18.3884
395	11	3	17	1	0.84769	18.3884
396	12	3	17	1	0.81192	18.3884
397	13	3	17	1	0.86829	18.3884
398	14	3	17	1	0.83123	18.3884
399	15	3	17	1	0.77467	18.3884
400	16	3	17	1	0.75378	18.3884
401	17	3	17	1	0.7272	18.3884
402	18	3	17	1	0.72522	18.3884
403	19	3	17	1	0.7313	18.3884
404	20	3	17	1	0.71706	18.3884
405	21	3	17	1	0.6969	18.3884
406	22	3	17	1	0.6798	18.3884
407	23	3	17	1	0.68478	18.3884
408	24	3	17	1	0.70658	18.3884
409	1	4	18	1	0.61307	11.0501
410	2	4	18	1	0.62418	11.0501
411	3	4	18	1	0.51409	11.0501
412	4	4	18	1	0.37536	11.0501
413	5	4	18	1	0.33966	11.0501
414	6	4	18	1	0.3672	11.0501
415	7	4	18	1	0.39984	11.0501
416	8	4	18	1	0.46864	11.0501
417	9	4	18	1	0.53429	11.0501
418	10	4	18	1	0.55348	11.0501
419	11	4	18	1	0.54487	11.0501
420	12	4	18	1	0.54899	11.0501
421	13	4	18	1	0.55488	11.0501
422	14	4	18	1	0.5151	11.0501
423	15	4	18	1	0.51102	11.0501
424	16	4	18	1	0.48348	11.0501
425	17	4	18	1	0.40788	11.0501
426	18	4	18	1	0.38582	11.0501
427	19	4	18	1	0.38352	11.0501
428	20	4	18	1	0.37944	11.0501
429	21	4	18	1	0.38077	11.0501
430	22	4	18	1	0.41406	11.0501
431	23	4	18	1	0.39037	11.0501
432	24	4	18	1	0.36006	11.0501
433	1	5	19	1	0.3811	10.0061
434	2	5	19	1	0.41514	10.0061
435	3	5	19	1	0.42951	10.0061
436	4	5	19	1	0.41208	10.0061
437	5	5	19	1	0.40891	10.0061
438	6	5	19	1	0.38862	10.0061
439	7	5	19	1	0.39243	10.0061
440	8	5	19	1	0.45835	10.0061
441	9	5	19	1	0.53025	10.0061
442	10	5	19	1	0.52224	10.0061
443	11	5	19	1	0.51809	10.0061
444	12	5	19	1	0.51712	10.0061
445	13	5	19	1	0.49852	10.0061
446	14	5	19	1	0.46763	10.0061
447	15	5	19	1	0.44676	10.0061
448	16	5	19	1	0.38831	10.0061
449	17	5	19	1	0.33734	10.0061
450	18	5	19	1	0.35123	10.0061
451	19	5	19	1	0.34299	10.0061
452	20	5	19	1	0.34884	10.0061
453	21	5	19	1	0.37168	10.0061
454	22	5	19	1	0.36516	10.0061
455	23	5	19	1	0.34402	10.0061
456	24	5	19	1	0.36977	10.0061
457	1	6	20	1	0.3838	8.52342
458	2	6	20	1	0.35802	8.52342
459	3	6	20	1	0.3927	8.52342
460	4	6	20	1	0.39552	8.52342
461	5	6	20	1	0.3838	8.52342
462	6	6	20	1	0.38556	8.52342
463	7	6	20	1	0.37801	8.52342
464	8	6	20	1	0.35123	8.52342
465	9	6	20	1	0.33835	8.52342
466	10	6	20	1	0.33681	8.52342
467	11	6	20	1	0.32651	8.52342
468	12	6	20	1	0.3131	8.52342
469	13	6	20	1	0.31613	8.52342
470	14	6	20	1	0.32342	8.52342
471	15	6	20	1	0.30704	8.52342
472	16	6	20	1	0.31007	8.52342
473	17	6	20	1	0.31212	8.52342
474	18	6	20	1	0.33681	8.52342
475	19	6	20	1	0.32651	8.52342
476	20	6	20	1	0.3535	8.52342
477	21	6	20	1	0.4029	8.52342
478	22	6	20	1	0.40494	8.52342
479	23	6	20	1	0.39693	8.52342
480	24	6	20	1	0.38964	8.52342
481	1	7	21	1	0.40188	8.21144
482	2	7	21	1	0.41097	8.21144
483	3	7	21	1	0.39984	8.21144
484	4	7	21	1	0.39861	8.21144
485	5	7	21	1	0.3825	8.21144
486	6	7	21	1	0.36822	8.21144
487	7	7	21	1	0.36771	8.21144
488	8	7	21	1	0.36924	8.21144
489	9	7	21	1	0.34272	8.21144
490	10	7	21	1	0.31108	8.21144
491	11	7	21	1	0.31415	8.21144
492	12	7	21	1	0.31416	8.21144
493	13	7	21	1	0.32033	8.21144
494	14	7	21	1	0.30805	8.21144
495	15	7	21	1	0.303	8.21144
496	16	7	21	1	0.30603	8.21144
497	17	7	21	1	0.30502	8.21144
498	18	7	21	1	0.3162	8.21144
499	19	7	21	1	0.30603	8.21144
500	20	7	21	1	0.31714	8.21144
501	21	7	21	1	0.34068	8.21144
502	22	7	21	1	0.34374	8.21144
503	23	7	21	1	0.32754	8.21144
504	24	7	21	1	0.3366	8.21144
505	1	1	22	1	0.36153	10.4263
506	2	1	22	1	0.35844	10.4263
507	3	1	22	1	0.35552	10.4263
508	4	1	22	1	0.35844	10.4263
509	5	1	22	1	0.32623	10.4263
510	6	1	22	1	0.3333	10.4263
511	7	1	22	1	0.36977	10.4263
512	8	1	22	1	0.46359	10.4263
513	9	1	22	1	0.50161	10.4263
514	10	1	22	1	0.49995	10.4263
515	11	1	22	1	0.49894	10.4263
516	12	1	22	1	0.50286	10.4263
517	13	1	22	1	0.52428	10.4263
518	14	1	22	1	0.5559	10.4263
519	15	1	22	1	0.505	10.4263
520	16	1	22	1	0.46561	10.4263
521	17	1	22	1	0.45217	10.4263
522	18	1	22	1	0.42723	10.4263
523	19	1	22	1	0.43329	10.4263
524	20	1	22	1	0.43363	10.4263
525	21	1	22	1	0.43329	10.4263
526	22	1	22	1	0.43044	10.4263
527	23	1	22	1	0.41814	10.4263
528	24	1	22	1	0.41713	10.4263
529	1	2	23	1	0.4488	16.9203
530	2	2	23	1	0.46968	16.9203
531	3	2	23	1	0.46762	16.9203
532	4	2	23	1	0.46041	16.9203
533	5	2	23	1	0.43632	16.9203
534	6	2	23	1	0.43758	16.9203
535	7	2	23	1	0.45114	16.9203
536	8	2	23	1	0.58782	16.9203
537	9	2	23	1	0.71196	16.9203
538	10	2	23	1	0.85042	16.9203
539	11	2	23	1	0.93228	16.9203
540	12	2	23	1	0.87466	16.9203
541	13	2	23	1	0.92106	16.9203
542	14	2	23	1	0.87567	16.9203
543	15	2	23	1	0.87859	16.9203
544	16	2	23	1	0.84354	16.9203
545	17	2	23	1	0.82416	16.9203
546	18	2	23	1	0.84354	16.9203
547	19	2	23	1	0.79662	16.9203
548	20	2	23	1	0.77724	16.9203
549	21	2	23	1	0.76529	16.9203
550	22	2	23	1	0.75808	16.9203
551	23	2	23	1	0.73427	16.9203
552	24	2	23	1	0.77353	16.9203
553	1	3	24	1	0.81988	16.4468
554	2	3	24	1	0.76962	16.4468
555	3	3	24	1	0.76962	16.4468
556	4	3	24	1	0.77353	16.4468
557	5	3	24	1	0.75072	16.4468
558	6	3	24	1	0.75786	16.4468
559	7	3	24	1	0.80031	16.4468
560	8	3	24	1	0.85078	16.4468
561	9	3	24	1	0.87516	16.4468
562	10	3	24	1	0.88981	16.4468
563	11	3	24	1	0.86961	16.4468
564	12	3	24	1	0.83844	16.4468
565	13	3	24	1	0.89095	16.4468
566	14	3	24	1	0.89095	16.4468
567	15	3	24	1	0.83533	16.4468
568	16	3	24	1	0.61302	16.4468
569	17	3	24	1	0.46308	16.4468
570	18	3	24	1	0.46968	16.4468
571	19	3	24	1	0.42642	16.4468
572	20	3	24	1	0.40788	16.4468
573	21	3	24	1	0.40891	16.4468
574	22	3	24	1	0.42126	16.4468
575	23	3	24	1	0.4429	16.4468
576	24	3	24	1	0.41106	16.4468
577	1	4	25	1	0.41303	11.1142
578	2	4	25	1	0.41406	11.1142
579	3	4	25	1	0.41915	11.1142
580	4	4	25	1	0.42016	11.1142
581	5	4	25	1	0.40703	11.1142
582	6	4	25	1	0.42738	11.1142
583	7	4	25	1	0.45753	11.1142
584	8	4	25	1	0.56304	11.1142
585	9	4	25	1	0.606	11.1142
586	10	4	25	1	0.59019	11.1142
587	11	4	25	1	0.58956	11.1142
588	12	4	25	1	0.53126	11.1142
589	13	4	25	1	0.50985	11.1142
590	14	4	25	1	0.50592	11.1142
591	15	4	25	1	0.49749	11.1142
592	16	4	25	1	0.46762	11.1142
593	17	4	25	1	0.44844	11.1142
594	18	4	25	1	0.45217	11.1142
595	19	4	25	1	0.44339	11.1142
596	20	4	25	1	0.42723	11.1142
597	21	4	25	1	0.40494	11.1142
598	22	4	25	1	0.3927	11.1142
599	23	4	25	1	0.36966	11.1142
600	24	4	25	1	0.35638	11.1142
601	1	5	26	1	0.37332	10.9715
602	2	5	26	1	0.37067	10.9715
603	3	5	26	1	0.36565	10.9715
604	4	5	26	1	0.35148	10.9715
605	5	5	26	1	0.36359	10.9715
606	6	5	26	1	0.36461	10.9715
607	7	5	26	1	0.37875	10.9715
608	8	5	26	1	0.53934	10.9715
609	9	5	26	1	0.74538	10.9715
610	10	5	26	1	0.7497	10.9715
611	11	5	26	1	0.71706	10.9715
612	12	5	26	1	0.71585	10.9715
613	13	5	26	1	0.72522	10.9715
614	14	5	26	1	0.62923	10.9715
615	15	5	26	1	0.41612	10.9715
616	16	5	26	1	0.37944	10.9715
617	17	5	26	1	0.33966	10.9715
618	18	5	26	1	0.33431	10.9715
619	19	5	26	1	0.34093	10.9715
620	20	5	26	1	0.34196	10.9715
621	21	5	26	1	0.35496	10.9715
622	22	5	26	1	0.36618	10.9715
623	23	5	26	1	0.33936	10.9715
624	24	5	26	1	0.36874	10.9715
625	1	6	27	1	0.3502	8.58849
626	2	6	27	1	0.33762	8.58849
627	3	6	27	1	0.3399	8.58849
628	4	6	27	1	0.33784	8.58849
629	5	6	27	1	0.34845	8.58849
630	6	6	27	1	0.34068	8.58849
631	7	6	27	1	0.3131	8.58849
632	8	6	27	1	0.33269	8.58849
633	9	6	27	1	0.34814	8.58849
634	10	6	27	1	0.35855	8.58849
635	11	6	27	1	0.37389	8.58849
636	12	6	27	1	0.36924	8.58849
637	13	6	27	1	0.36874	8.58849
638	14	6	27	1	0.35904	8.58849
639	15	6	27	1	0.35088	8.58849
640	16	6	27	1	0.34643	8.58849
641	17	6	27	1	0.34138	8.58849
642	18	6	27	1	0.35292	8.58849
643	19	6	27	1	0.34884	8.58849
644	20	6	27	1	0.37774	8.58849
645	21	6	27	1	0.39066	8.58849
646	22	6	27	1	0.40086	8.58849
647	23	6	27	1	0.40494	8.58849
648	24	6	27	1	0.39576	8.58849
649	1	7	28	1	0.39693	8.41592
650	2	7	28	1	0.38784	8.41592
651	3	7	28	1	0.39346	8.41592
652	4	7	28	1	0.41303	8.41592
653	5	7	28	1	0.43044	8.41592
654	6	7	28	1	0.41309	8.41592
655	7	7	28	1	0.3672	8.41592
656	8	7	28	1	0.36865	8.41592
657	9	7	28	1	0.32825	8.41592
658	10	7	28	1	0.32436	8.41592
659	11	7	28	1	0.32651	8.41592
660	12	7	28	1	0.33252	8.41592
661	13	7	28	1	0.31512	8.41592
662	14	7	28	1	0.31518	8.41592
663	15	7	28	1	0.31212	8.41592
664	16	7	28	1	0.31106	8.41592
665	17	7	28	1	0.303	8.41592
666	18	7	28	1	0.31518	8.41592
667	19	7	28	1	0.32334	8.41592
668	20	7	28	1	0.34272	8.41592
669	21	7	28	1	0.33229	8.41592
670	22	7	28	1	0.35329	8.41592
671	23	7	28	1	0.35844	8.41592
672	24	7	28	1	0.3519	8.41592
673	1	1	29	1	0.19392	8.82801
674	2	1	29	1	0.20497	8.82801
675	3	1	29	1	0.22042	8.82801
676	4	1	29	1	0.24174	8.82801
677	5	1	29	1	0.2678	8.82801
678	6	1	29	1	0.27573	8.82801
679	7	1	29	1	0.30199	8.82801
680	8	1	29	1	0.41818	8.82801
681	9	1	29	1	0.49234	8.82801
682	10	1	29	1	0.46614	8.82801
683	11	1	29	1	0.47124	8.82801
684	12	1	29	1	0.46662	8.82801
685	13	1	29	1	0.46968	8.82801
686	14	1	29	1	0.45652	8.82801
687	15	1	29	1	0.45423	8.82801
688	16	1	29	1	0.40198	8.82801
689	17	1	29	1	0.36414	8.82801
690	18	1	29	1	0.34196	8.82801
691	19	1	29	1	0.34441	8.82801
692	20	1	29	1	0.3927	8.82801
693	21	1	29	1	0.39693	8.82801
694	22	1	29	1	0.39693	8.82801
695	23	1	29	1	0.39576	8.82801
696	24	1	29	1	0.39168	8.82801
697	1	2	30	1	0.40788	10.6945
698	2	2	30	1	0.4233	10.6945
699	3	2	30	1	0.41412	10.6945
700	4	2	30	1	0.41106	10.6945
701	5	2	30	1	0.39882	10.6945
702	6	2	30	1	0.39794	10.6945
703	7	2	30	1	0.39474	10.6945
704	8	2	30	1	0.49389	10.6945
705	9	2	30	1	0.53328	10.6945
706	10	2	30	1	0.5562	10.6945
707	11	2	30	1	0.54237	10.6945
708	12	2	30	1	0.52836	10.6945
709	13	2	30	1	0.50388	10.6945
710	14	2	30	1	0.51306	10.6945
711	15	2	30	1	0.49337	10.6945
712	16	2	30	1	0.46104	10.6945
713	17	2	30	1	0.42745	10.6945
714	18	2	30	1	0.43363	10.6945
715	19	2	30	1	0.41915	10.6945
716	20	2	30	1	0.41208	10.6945
717	21	2	30	1	0.38964	10.6945
718	22	2	30	1	0.37774	10.6945
719	23	2	30	1	0.3737	10.6945
720	24	2	30	1	0.38784	10.6945
721	1	3	31	1	0.41713	11.0085
722	2	3	31	1	0.44339	11.0085
723	3	3	31	1	0.44268	11.0085
724	4	3	31	1	0.43834	11.0085
725	5	3	31	1	0.43569	11.0085
726	6	3	31	1	0.4429	11.0085
727	7	3	31	1	0.44496	11.0085
728	8	3	31	1	0.50601	11.0085
729	9	3	31	1	0.57166	11.0085
730	10	3	31	1	0.56304	11.0085
731	11	3	31	1	0.56444	11.0085
732	12	3	31	1	0.53958	11.0085
733	13	3	31	1	0.52224	11.0085
734	14	3	31	1	0.49028	11.0085
735	15	3	31	1	0.47838	11.0085
736	16	3	31	1	0.44137	11.0085
737	17	3	31	1	0.39474	11.0085
738	18	3	31	1	0.40376	11.0085
739	19	3	31	1	0.3914	11.0085
740	20	3	31	1	0.41921	11.0085
741	21	3	31	1	0.40685	11.0085
742	22	3	31	1	0.40698	11.0085
743	23	3	31	1	0.42738	11.0085
744	24	3	31	1	0.41612	11.0085
745	1	4	1	2	0.0459	1.77759
746	2	4	1	2	0.04646	1.77759
747	3	4	1	2	0.04998	1.77759
748	4	4	1	2	0.05047	1.77759
749	5	4	1	2	0.04848	1.77759
750	6	4	1	2	0.04747	1.77759
751	7	4	1	2	0.06324	1.77759
752	8	4	1	2	0.10506	1.77759
753	9	4	1	2	0.11424	1.77759
754	10	4	1	2	0.1111	1.77759
755	11	4	1	2	0.10404	1.77759
756	12	4	1	2	0.11312	1.77759
757	13	4	1	2	0.12322	1.77759
758	14	4	1	2	0.14076	1.77759
759	15	4	1	2	0.09486	1.77759
760	16	4	1	2	0.0808	1.77759
761	17	4	1	2	0.07373	1.77759
762	18	4	1	2	0.07575	1.77759
763	19	4	1	2	0.07548	1.77759
764	20	4	1	2	0.04738	1.77759
765	21	4	1	2	0.04284	1.77759
766	22	4	1	2	0.04223	1.77759
767	23	4	1	2	0.03978	1.77759
768	24	4	1	2	0.0412	1.77759
769	1	5	2	2	0.0408	1.55903
770	2	5	2	2	0.0408	1.55903
771	3	5	2	2	0.0408	1.55903
772	4	5	2	2	0.04326	1.55903
773	5	5	2	2	0.04444	1.55903
774	6	5	2	2	0.04998	1.55903
775	7	5	2	2	0.06464	1.55903
776	8	5	2	2	0.10504	1.55903
777	9	5	2	2	0.10908	1.55903
778	10	5	2	2	0.10807	1.55903
779	11	5	2	2	0.13566	1.55903
780	12	5	2	2	0.12978	1.55903
781	13	5	2	2	0.1313	1.55903
782	14	5	2	2	0.12625	1.55903
783	15	5	2	2	0.10609	1.55903
784	16	5	2	2	0.03708	1.55903
785	17	5	2	2	0.03193	1.55903
786	18	5	2	2	0.03162	1.55903
787	19	5	2	2	0.0357	1.55903
788	20	5	2	2	0.02958	1.55903
789	21	5	2	2	0.02958	1.55903
790	22	5	2	2	0.03193	1.55903
791	23	5	2	2	0.02781	1.55903
792	24	5	2	2	0.02781	1.55903
793	1	6	3	2	0.02626	0.60989
794	2	6	3	2	0.02754	0.60989
795	3	6	3	2	0.02678	0.60989
796	4	6	3	2	0.02781	0.60989
797	5	6	3	2	0.02754	0.60989
798	6	6	3	2	0.02828	0.60989
799	7	6	3	2	0.0303	0.60989
800	8	6	3	2	0.02626	0.60989
801	9	6	3	2	0.02222	0.60989
802	10	6	3	2	0.02424	0.60989
803	11	6	3	2	0.02448	0.60989
804	12	6	3	2	0.02266	0.60989
805	13	6	3	2	0.02266	0.60989
806	14	6	3	2	0.02244	0.60989
807	15	6	3	2	0.02323	0.60989
808	16	6	3	2	0.02244	0.60989
809	17	6	3	2	0.02369	0.60989
810	18	6	3	2	0.02424	0.60989
811	19	6	3	2	0.02346	0.60989
812	20	6	3	2	0.02626	0.60989
813	21	6	3	2	0.02652	0.60989
814	22	6	3	2	0.02652	0.60989
815	23	6	3	2	0.02652	0.60989
816	24	6	3	2	0.02754	0.60989
817	1	7	4	2	0.02727	0.60834
818	2	7	4	2	0.0306	0.60834
819	3	7	4	2	0.02929	0.60834
820	4	7	4	2	0.02727	0.60834
821	5	7	4	2	0.02856	0.60834
822	6	7	4	2	0.02856	0.60834
823	7	7	4	2	0.02828	0.60834
824	8	7	4	2	0.02525	0.60834
825	9	7	4	2	0.02222	0.60834
826	10	7	4	2	0.02346	0.60834
827	11	7	4	2	0.02244	0.60834
828	12	7	4	2	0.02369	0.60834
829	13	7	4	2	0.02369	0.60834
830	14	7	4	2	0.02142	0.60834
831	15	7	4	2	0.0202	0.60834
832	16	7	4	2	0.02163	0.60834
833	17	7	4	2	0.01919	0.60834
834	18	7	4	2	0.02266	0.60834
835	19	7	4	2	0.02346	0.60834
836	20	7	4	2	0.02626	0.60834
837	21	7	4	2	0.02754	0.60834
838	22	7	4	2	0.02828	0.60834
839	23	7	4	2	0.02856	0.60834
840	24	7	4	2	0.02856	0.60834
841	1	1	5	2	0.02781	1.87877
842	2	1	5	2	0.02652	1.87877
843	3	1	5	2	0.02856	1.87877
844	4	1	5	2	0.02856	1.87877
845	5	1	5	2	0.02754	1.87877
846	6	1	5	2	0.02652	1.87877
847	7	1	5	2	0.04545	1.87877
848	8	1	5	2	0.08484	1.87877
849	9	1	5	2	0.09064	1.87877
850	10	1	5	2	0.08858	1.87877
851	11	1	5	2	0.09167	1.87877
852	12	1	5	2	0.08888	1.87877
853	13	1	5	2	0.11526	1.87877
854	14	1	5	2	0.11832	1.87877
855	15	1	5	2	0.09494	1.87877
856	16	1	5	2	0.09588	1.87877
857	17	1	5	2	0.10302	1.87877
858	18	1	5	2	0.10201	1.87877
859	19	1	5	2	0.10302	1.87877
860	20	1	5	2	0.09696	1.87877
861	21	1	5	2	0.09595	1.87877
862	22	1	5	2	0.0969	1.87877
863	23	1	5	2	0.09996	1.87877
864	24	1	5	2	0.10098	1.87877
865	1	2	6	2	0.09888	7.59483
866	2	2	6	2	0.09494	7.59483
867	3	2	6	2	0.09682	7.59483
868	4	2	6	2	0.09579	7.59483
869	5	2	6	2	0.09292	7.59483
870	6	2	6	2	0.09682	7.59483
871	7	2	6	2	0.10197	7.59483
872	8	2	6	2	0.2397	7.59483
873	9	2	6	2	0.40086	7.59483
874	10	2	6	2	0.44982	7.59483
875	11	2	6	2	0.42622	7.59483
876	12	2	6	2	0.43758	7.59483
877	13	2	6	2	0.44702	7.59483
878	14	2	6	2	0.4284	7.59483
879	15	2	6	2	0.41713	7.59483
880	16	2	6	2	0.41612	7.59483
881	17	2	6	2	0.41097	7.59483
882	18	2	6	2	0.40479	7.59483
883	19	2	6	2	0.41097	7.59483
884	20	2	6	2	0.4131	7.59483
885	21	2	6	2	0.41303	7.59483
886	22	2	6	2	0.41097	7.59483
887	23	2	6	2	0.40273	7.59483
888	24	2	6	2	0.38728	7.59483
889	1	3	7	2	0.38556	6.88197
890	2	3	7	2	0.37976	6.88197
891	3	3	7	2	0.37572	6.88197
892	4	3	7	2	0.37944	6.88197
893	5	3	7	2	0.37471	6.88197
894	6	3	7	2	0.37471	6.88197
895	7	3	7	2	0.39964	6.88197
896	8	3	7	2	0.40299	6.88197
897	9	3	7	2	0.42738	6.88197
898	10	3	7	2	0.43554	6.88197
899	11	3	7	2	0.43569	6.88197
900	12	3	7	2	0.42824	6.88197
901	13	3	7	2	0.4242	6.88197
902	14	3	7	2	0.42127	6.88197
903	15	3	7	2	0.39758	6.88197
904	16	3	7	2	0.37067	6.88197
905	17	3	7	2	0.10908	6.88197
906	18	3	7	2	0.06489	6.88197
907	19	3	7	2	0.0618	6.88197
908	20	3	7	2	0.04429	6.88197
909	21	3	7	2	0.04532	6.88197
910	22	3	7	2	0.04646	6.88197
911	23	3	7	2	0.04141	6.88197
912	24	3	7	2	0.05562	6.88197
913	1	4	8	2	0.05252	1.67477
914	2	4	8	2	0.05353	1.67477
915	3	4	8	2	0.05712	1.67477
916	4	4	8	2	0.05712	1.67477
917	5	4	8	2	0.05454	1.67477
918	6	4	8	2	0.05916	1.67477
919	7	4	8	2	0.0714	1.67477
920	8	4	8	2	0.10403	1.67477
921	9	4	8	2	0.103	1.67477
922	10	4	8	2	0.11413	1.67477
923	11	4	8	2	0.12138	1.67477
924	12	4	8	2	0.11639	1.67477
925	13	4	8	2	0.1122	1.67477
926	14	4	8	2	0.12322	1.67477
927	15	4	8	2	0.10506	1.67477
928	16	4	8	2	0.06767	1.67477
929	17	4	8	2	0.03978	1.67477
930	18	4	8	2	0.03774	1.67477
931	19	4	8	2	0.0408	1.67477
932	20	4	8	2	0.03708	1.67477
933	21	4	8	2	0.03708	1.67477
934	22	4	8	2	0.03636	1.67477
935	23	4	8	2	0.03535	1.67477
936	24	4	8	2	0.03811	1.67477
937	1	5	9	2	0.03708	1.32968
938	2	5	9	2	0.03737	1.32968
939	3	5	9	2	0.03636	1.32968
940	4	5	9	2	0.03737	1.32968
941	5	5	9	2	0.03811	1.32968
942	6	5	9	2	0.03914	1.32968
943	7	5	9	2	0.04949	1.32968
944	8	5	9	2	0.09064	1.32968
945	9	5	9	2	0.09792	1.32968
946	10	5	9	2	0.10201	1.32968
947	11	5	9	2	0.09894	1.32968
948	12	5	9	2	0.0969	1.32968
949	13	5	9	2	0.0969	1.32968
950	14	5	9	2	0.0909	1.32968
951	15	5	9	2	0.07344	1.32968
952	16	5	9	2	0.05253	1.32968
953	17	5	9	2	0.03296	1.32968
954	18	5	9	2	0.03193	1.32968
955	19	5	9	2	0.03468	1.32968
956	20	5	9	2	0.03333	1.32968
957	21	5	9	2	0.0309	1.32968
958	22	5	9	2	0.02958	1.32968
959	23	5	9	2	0.0306	1.32968
960	24	5	9	2	0.0306	1.32968
961	1	6	10	2	0.02987	0.66343
962	2	6	10	2	0.02987	0.66343
963	3	6	10	2	0.02929	0.66343
964	4	6	10	2	0.02958	0.66343
965	5	6	10	2	0.03193	0.66343
966	6	6	10	2	0.03162	0.66343
967	7	6	10	2	0.0306	0.66343
968	8	6	10	2	0.02525	0.66343
969	9	6	10	2	0.0255	0.66343
970	10	6	10	2	0.02652	0.66343
971	11	6	10	2	0.02472	0.66343
972	12	6	10	2	0.02652	0.66343
973	13	6	10	2	0.02575	0.66343
974	14	6	10	2	0.02678	0.66343
975	15	6	10	2	0.02472	0.66343
976	16	6	10	2	0.02222	0.66343
977	17	6	10	2	0.0204	0.66343
978	18	6	10	2	0.02424	0.66343
979	19	6	10	2	0.02987	0.66343
980	20	6	10	2	0.02987	0.66343
981	21	6	10	2	0.02958	0.66343
982	22	6	10	2	0.0303	0.66343
983	23	6	10	2	0.02856	0.66343
984	24	6	10	2	0.02987	0.66343
985	1	7	11	2	0.03162	0.61791
986	2	7	11	2	0.03193	0.61791
987	3	7	11	2	0.02828	0.61791
988	4	7	11	2	0.02727	0.61791
989	5	7	11	2	0.02781	0.61791
990	6	7	11	2	0.02652	0.61791
991	7	7	11	2	0.0309	0.61791
992	8	7	11	2	0.02244	0.61791
993	9	7	11	2	0.02472	0.61791
994	10	7	11	2	0.0255	0.61791
995	11	7	11	2	0.02448	0.61791
996	12	7	11	2	0.02121	0.61791
997	13	7	11	2	0.02369	0.61791
998	14	7	11	2	0.02222	0.61791
999	15	7	11	2	0.01919	0.61791
1000	16	7	11	2	0.0202	0.61791
1001	17	7	11	2	0.02222	0.61791
1002	18	7	11	2	0.02163	0.61791
1003	19	7	11	2	0.0204	0.61791
1004	20	7	11	2	0.02987	0.61791
1005	21	7	11	2	0.02884	0.61791
1006	22	7	11	2	0.02987	0.61791
1007	23	7	11	2	0.02781	0.61791
1008	24	7	11	2	0.02929	0.61791
1009	1	1	12	2	0.02727	1.83021
1010	2	1	12	2	0.02781	1.83021
1011	3	1	12	2	0.02856	1.83021
1012	4	1	12	2	0.02828	1.83021
1013	5	1	12	2	0.02884	1.83021
1014	6	1	12	2	0.02958	1.83021
1015	7	1	12	2	0.04646	1.83021
1016	8	1	12	2	0.09797	1.83021
1017	9	1	12	2	0.09785	1.83021
1018	10	1	12	2	0.0927	1.83021
1019	11	1	12	2	0.09384	1.83021
1020	12	1	12	2	0.09494	1.83021
1021	13	1	12	2	0.1122	1.83021
1022	14	1	12	2	0.10504	1.83021
1023	15	1	12	2	0.09785	1.83021
1024	16	1	12	2	0.09078	1.83021
1025	17	1	12	2	0.09064	1.83021
1026	18	1	12	2	0.08787	1.83021
1027	19	1	12	2	0.08772	1.83021
1028	20	1	12	2	0.09476	1.83021
1029	21	1	12	2	0.09384	1.83021
1030	22	1	12	2	0.09282	1.83021
1031	23	1	12	2	0.0927	1.83021
1032	24	1	12	2	0.08989	1.83021
1033	1	2	13	2	0.09167	7.60417
1034	2	2	13	2	0.0909	7.60417
1035	3	2	13	2	0.0918	7.60417
1036	4	2	13	2	0.09282	7.60417
1037	5	2	13	2	0.09167	7.60417
1038	6	2	13	2	0.0927	7.60417
1039	7	2	13	2	0.11639	7.60417
1040	8	2	13	2	0.31518	7.60417
1041	9	2	13	2	0.36966	7.60417
1042	10	2	13	2	0.36461	7.60417
1043	11	2	13	2	0.45084	7.60417
1044	12	2	13	2	0.43531	7.60417
1045	13	2	13	2	0.42738	7.60417
1046	14	2	13	2	0.45084	7.60417
1047	15	2	13	2	0.40703	7.60417
1048	16	2	13	2	0.43733	7.60417
1049	17	2	13	2	0.4429	7.60417
1050	18	2	13	2	0.4242	7.60417
1051	19	2	13	2	0.40685	7.60417
1052	20	2	13	2	0.40494	7.60417
1053	21	2	13	2	0.39693	7.60417
1054	22	2	13	2	0.40067	7.60417
1055	23	2	13	2	0.40273	7.60417
1056	24	2	13	2	0.39882	7.60417
1057	1	3	14	2	0.39592	9.875
1058	2	3	14	2	0.4017	9.875
1059	3	3	14	2	0.39882	9.875
1060	4	3	14	2	0.40097	9.875
1061	5	3	14	2	0.40392	9.875
1062	6	3	14	2	0.38964	9.875
1063	7	3	14	2	0.41406	9.875
1064	8	3	14	2	0.43554	9.875
1065	9	3	14	2	0.45594	9.875
1066	10	3	14	2	0.4635	9.875
1067	11	3	14	2	0.45938	9.875
1068	12	3	14	2	0.44945	9.875
1069	13	3	14	2	0.459	9.875
1070	14	3	14	2	0.43127	9.875
1071	15	3	14	2	0.39289	9.875
1072	16	3	14	2	0.38683	9.875
1073	17	3	14	2	0.39491	9.875
1074	18	3	14	2	0.42126	9.875
1075	19	3	14	2	0.41616	9.875
1076	20	3	14	2	0.39996	9.875
1077	21	3	14	2	0.3774	9.875
1078	22	3	14	2	0.37168	9.875
1079	23	3	14	2	0.37638	9.875
1080	24	3	14	2	0.37842	9.875
1081	1	4	15	2	0.3723	3.745
1082	2	4	15	2	0.36966	3.745
1083	3	4	15	2	0.37389	3.745
1084	4	4	15	2	0.37067	3.745
1085	5	4	15	2	0.37698	3.745
1086	6	4	15	2	0.38316	3.745
1087	7	4	15	2	0.25351	3.745
1088	8	4	15	2	0.09579	3.745
1089	9	4	15	2	0.09894	3.745
1090	10	4	15	2	0.0969	3.745
1091	11	4	15	2	0.10094	3.745
1092	12	4	15	2	0.09996	3.745
1093	13	4	15	2	0.09999	3.745
1094	14	4	15	2	0.10403	3.745
1095	15	4	15	2	0.08772	3.745
1096	16	4	15	2	0.06901	3.745
1097	17	4	15	2	0.04429	3.745
1098	18	4	15	2	0.04386	3.745
1099	19	4	15	2	0.0408	3.745
1100	20	4	15	2	0.03978	3.745
1101	21	4	15	2	0.05656	3.745
1102	22	4	15	2	0.06222	3.745
1103	23	4	15	2	0.0612	3.745
1104	24	4	15	2	0.04284	3.745
1105	1	5	16	2	0.04242	1.46716
1106	2	5	16	2	0.03914	1.46716
1107	3	5	16	2	0.03535	1.46716
1108	4	5	16	2	0.03333	1.46716
1109	5	5	16	2	0.03232	1.46716
1110	6	5	16	2	0.03468	1.46716
1111	7	5	16	2	0.05871	1.46716
1112	8	5	16	2	0.0927	1.46716
1113	9	5	16	2	0.09898	1.46716
1114	10	5	16	2	0.103	1.46716
1115	11	5	16	2	0.09494	1.46716
1116	12	5	16	2	0.08989	1.46716
1117	13	5	16	2	0.1071	1.46716
1118	14	5	16	2	0.10712	1.46716
1119	15	5	16	2	0.103	1.46716
1120	16	5	16	2	0.09588	1.46716
1121	17	5	16	2	0.09078	1.46716
1122	18	5	16	2	0.0459	1.46716
1123	19	5	16	2	0.02828	1.46716
1124	20	5	16	2	0.02652	1.46716
1125	21	5	16	2	0.02884	1.46716
1126	22	5	16	2	0.02652	1.46716
1127	23	5	16	2	0.02626	1.46716
1128	24	5	16	2	0.0255	1.46716
1129	1	6	17	2	0.02575	0.65192
1130	2	6	17	2	0.02525	0.65192
1131	3	6	17	2	0.02575	0.65192
1132	4	6	17	2	0.02525	0.65192
1133	5	6	17	2	0.0255	0.65192
1134	6	6	17	2	0.02448	0.65192
1135	7	6	17	2	0.02929	0.65192
1136	8	6	17	2	0.0309	0.65192
1137	9	6	17	2	0.02525	0.65192
1138	10	6	17	2	0.02448	0.65192
1139	11	6	17	2	0.02575	0.65192
1140	12	6	17	2	0.02575	0.65192
1141	13	6	17	2	0.02626	0.65192
1142	14	6	17	2	0.02626	0.65192
1143	15	6	17	2	0.02323	0.65192
1144	16	6	17	2	0.02266	0.65192
1145	17	6	17	2	0.02323	0.65192
1146	18	6	17	2	0.0255	0.65192
1147	19	6	17	2	0.02781	0.65192
1148	20	6	17	2	0.03232	0.65192
1149	21	6	17	2	0.03296	0.65192
1150	22	6	17	2	0.03333	0.65192
1151	23	6	17	2	0.03232	0.65192
1152	24	6	17	2	0.03264	0.65192
1153	1	7	18	2	0.03296	0.66248
1154	2	7	18	2	0.03434	0.66248
1155	3	7	18	2	0.03333	0.66248
1156	4	7	18	2	0.03468	0.66248
1157	5	7	18	2	0.03232	0.66248
1158	6	7	18	2	0.03399	0.66248
1159	7	7	18	2	0.03264	0.66248
1160	8	7	18	2	0.02448	0.66248
1161	9	7	18	2	0.02575	0.66248
1162	10	7	18	2	0.02525	0.66248
1163	11	7	18	2	0.02323	0.66248
1164	12	7	18	2	0.02323	0.66248
1165	13	7	18	2	0.02244	0.66248
1166	14	7	18	2	0.02222	0.66248
1167	15	7	18	2	0.02244	0.66248
1168	16	7	18	2	0.02244	0.66248
1169	17	7	18	2	0.02244	0.66248
1170	18	7	18	2	0.02424	0.66248
1171	19	7	18	2	0.02856	0.66248
1172	20	7	18	2	0.0306	0.66248
1173	21	7	18	2	0.02828	0.66248
1174	22	7	18	2	0.02727	0.66248
1175	23	7	18	2	0.02781	0.66248
1176	24	7	18	2	0.02754	0.66248
1177	1	1	19	2	0.03193	1.51845
1178	2	1	19	2	0.03264	1.51845
1179	3	1	19	2	0.0306	1.51845
1180	4	1	19	2	0.0306	1.51845
1181	5	1	19	2	0.0306	1.51845
1182	6	1	19	2	0.03366	1.51845
1183	7	1	19	2	0.04692	1.51845
1184	8	1	19	2	0.09292	1.51845
1185	9	1	19	2	0.08888	1.51845
1186	10	1	19	2	0.09494	1.51845
1187	11	1	19	2	0.08888	1.51845
1188	12	1	19	2	0.08343	1.51845
1189	13	1	19	2	0.0927	1.51845
1190	14	1	19	2	0.11118	1.51845
1191	15	1	19	2	0.10403	1.51845
1192	16	1	19	2	0.10197	1.51845
1193	17	1	19	2	0.09588	1.51845
1194	18	1	19	2	0.07548	1.51845
1195	19	1	19	2	0.04532	1.51845
1196	20	1	19	2	0.04429	1.51845
1197	21	1	19	2	0.0404	1.51845
1198	22	1	19	2	0.04242	1.51845
1199	23	1	19	2	0.03939	1.51845
1200	24	1	19	2	0.03939	1.51845
1201	1	2	20	2	0.03838	1.84615
1202	2	2	20	2	0.03876	1.84615
1203	3	2	20	2	0.03838	1.84615
1204	4	2	20	2	0.03876	1.84615
1205	5	2	20	2	0.03876	1.84615
1206	6	2	20	2	0.03978	1.84615
1207	7	2	20	2	0.05356	1.84615
1208	8	2	20	2	0.08181	1.84615
1209	9	2	20	2	0.0918	1.84615
1210	10	2	20	2	0.09894	1.84615
1211	11	2	20	2	0.09167	1.84615
1212	12	2	20	2	0.08262	1.84615
1213	13	2	20	2	0.0867	1.84615
1214	14	2	20	2	0.101	1.84615
1215	15	2	20	2	0.10201	1.84615
1216	16	2	20	2	0.08772	1.84615
1217	17	2	20	2	0.08568	1.84615
1218	18	2	20	2	0.10706	1.84615
1219	19	2	20	2	0.10403	1.84615
1220	20	2	20	2	0.08585	1.84615
1221	21	2	20	2	0.08652	1.84615
1222	22	2	20	2	0.08874	1.84615
1223	23	2	20	2	0.08874	1.84615
1224	24	2	20	2	0.08888	1.84615
1225	1	3	21	2	0.08181	7.40925
1226	2	3	21	2	0.08137	7.40925
1227	3	3	21	2	0.08364	7.40925
1228	4	3	21	2	0.08549	7.40925
1229	5	3	21	2	0.08858	7.40925
1230	6	3	21	2	0.0918	7.40925
1231	7	3	21	2	0.09792	7.40925
1232	8	3	21	2	0.23793	7.40925
1233	9	3	21	2	0.4335	7.40925
1234	10	3	21	2	0.43363	7.40925
1235	11	3	21	2	0.3672	7.40925
1236	12	3	21	2	0.44187	7.40925
1237	13	3	21	2	0.44166	7.40925
1238	14	3	21	2	0.4386	7.40925
1239	15	3	21	2	0.43452	7.40925
1240	16	3	21	2	0.42432	7.40925
1241	17	3	21	2	0.4223	7.40925
1242	18	3	21	2	0.38964	7.40925
1243	19	3	21	2	0.3914	7.40925
1244	20	3	21	2	0.38481	7.40925
1245	21	3	21	2	0.38862	7.40925
1246	22	3	21	2	0.39066	7.40925
1247	23	3	21	2	0.3914	7.40925
1248	24	3	21	2	0.38658	7.40925
1249	1	4	22	2	0.39168	9.56689
1250	2	4	22	2	0.38784	9.56689
1251	3	4	22	2	0.38885	9.56689
1252	4	4	22	2	0.39346	9.56689
1253	5	4	22	2	0.3838	9.56689
1254	6	4	22	2	0.39449	9.56689
1255	7	4	22	2	0.4131	9.56689
1256	8	4	22	2	0.42534	9.56689
1257	9	4	22	2	0.42534	9.56689
1258	10	4	22	2	0.44945	9.56689
1259	11	4	22	2	0.43044	9.56689
1260	12	4	22	2	0.42126	9.56689
1261	13	4	22	2	0.43146	9.56689
1262	14	4	22	2	0.44393	9.56689
1263	15	4	22	2	0.40804	9.56689
1264	16	4	22	2	0.41107	9.56689
1265	17	4	22	2	0.39758	9.56689
1266	18	4	22	2	0.36966	9.56689
1267	19	4	22	2	0.3723	9.56689
1268	20	4	22	2	0.36516	9.56689
1269	21	4	22	2	0.36414	9.56689
1270	22	4	22	2	0.36874	9.56689
1271	23	4	22	2	0.3672	9.56689
1272	24	4	22	2	0.36256	9.56689
1273	1	5	23	2	0.35855	3.19524
1274	2	5	23	2	0.36312	3.19524
1275	3	5	23	2	0.33633	3.19524
1276	4	5	23	2	0.35451	3.19524
1277	5	5	23	2	0.36462	3.19524
1278	6	5	23	2	0.19673	3.19524
1279	7	5	23	2	0.05304	3.19524
1280	8	5	23	2	0.09282	3.19524
1281	9	5	23	2	0.11021	3.19524
1282	10	5	23	2	0.09393	3.19524
1283	11	5	23	2	0.08874	3.19524
1284	12	5	23	2	0.09384	3.19524
1285	13	5	23	2	0.09996	3.19524
1286	14	5	23	2	0.11918	3.19524
1287	15	5	23	2	0.1133	3.19524
1288	16	5	23	2	0.08989	3.19524
1289	17	5	23	2	0.03978	3.19524
1290	18	5	23	2	0.03502	3.19524
1291	19	5	23	2	0.03399	3.19524
1292	20	5	23	2	0.03333	3.19524
1293	21	5	23	2	0.03399	3.19524
1294	22	5	23	2	0.03399	3.19524
1295	23	5	23	2	0.02856	3.19524
1296	24	5	23	2	0.02781	3.19524
1297	1	6	24	2	0.02781	0.62108
1298	2	6	24	2	0.02856	0.62108
1299	3	6	24	2	0.02754	0.62108
1300	4	6	24	2	0.02929	0.62108
1301	5	6	24	2	0.02884	0.62108
1302	6	6	24	2	0.02828	0.62108
1303	7	6	24	2	0.03131	0.62108
1304	8	6	24	2	0.02448	0.62108
1305	9	6	24	2	0.02448	0.62108
1306	10	6	24	2	0.02323	0.62108
1307	11	6	24	2	0.02448	0.62108
1308	12	6	24	2	0.02781	0.62108
1309	13	6	24	2	0.02369	0.62108
1310	14	6	24	2	0.02472	0.62108
1311	15	6	24	2	0.02323	0.62108
1312	16	6	24	2	0.02266	0.62108
1313	17	6	24	2	0.02266	0.62108
1314	18	6	24	2	0.02424	0.62108
1315	19	6	24	2	0.02525	0.62108
1316	20	6	24	2	0.0255	0.62108
1317	21	6	24	2	0.02575	0.62108
1318	22	6	24	2	0.0255	0.62108
1319	23	6	24	2	0.02525	0.62108
1320	24	6	24	2	0.02652	0.62108
1321	1	7	25	2	0.02958	0.62193
1322	2	7	25	2	0.02958	0.62193
1323	3	7	25	2	0.02727	0.62193
1324	4	7	25	2	0.02781	0.62193
1325	5	7	25	2	0.02884	0.62193
1326	6	7	25	2	0.02652	0.62193
1327	7	7	25	2	0.02929	0.62193
1328	8	7	25	2	0.02575	0.62193
1329	9	7	25	2	0.02346	0.62193
1330	10	7	25	2	0.02369	0.62193
1331	11	7	25	2	0.02346	0.62193
1332	12	7	25	2	0.02472	0.62193
1333	13	7	25	2	0.02323	0.62193
1334	14	7	25	2	0.02244	0.62193
1335	15	7	25	2	0.02121	0.62193
1336	16	7	25	2	0.02163	0.62193
1337	17	7	25	2	0.0204	0.62193
1338	18	7	25	2	0.02448	0.62193
1339	19	7	25	2	0.02727	0.62193
1340	20	7	25	2	0.02781	0.62193
1341	21	7	25	2	0.02958	0.62193
1342	22	7	25	2	0.02754	0.62193
1343	23	7	25	2	0.02856	0.62193
1344	24	7	25	2	0.02781	0.62193
1345	1	1	26	2	0.02781	1.48787
1346	2	1	26	2	0.02727	1.48787
1347	3	1	26	2	0.02754	1.48787
1348	4	1	26	2	0.02856	1.48787
1349	5	1	26	2	0.02727	1.48787
1350	6	1	26	2	0.02727	1.48787
1351	7	1	26	2	0.0412	1.48787
1352	8	1	26	2	0.08034	1.48787
1353	9	1	26	2	0.09999	1.48787
1354	10	1	26	2	0.12463	1.48787
1355	11	1	26	2	0.12051	1.48787
1356	12	1	26	2	0.11312	1.48787
1357	13	1	26	2	0.11227	1.48787
1358	14	1	26	2	0.1111	1.48787
1359	15	1	26	2	0.10914	1.48787
1360	16	1	26	2	0.09191	1.48787
1361	17	1	26	2	0.04692	1.48787
1362	18	1	26	2	0.04488	1.48787
1363	19	1	26	2	0.04182	1.48787
1364	20	1	26	2	0.03774	1.48787
1365	21	1	26	2	0.03672	1.48787
1366	22	1	26	2	0.03708	1.48787
1367	23	1	26	2	0.03708	1.48787
1368	24	1	26	2	0.0357	1.48787
1369	1	2	27	2	0.04242	2.37833
1370	2	2	27	2	0.03978	2.37833
1371	3	2	27	2	0.0412	2.37833
1372	4	2	27	2	0.04017	2.37833
1373	5	2	27	2	0.0404	2.37833
1374	6	2	27	2	0.04284	2.37833
1375	7	2	27	2	0.05459	2.37833
1376	8	2	27	2	0.11021	2.37833
1377	9	2	27	2	0.14039	2.37833
1378	10	2	27	2	0.14626	2.37833
1379	11	2	27	2	0.14382	2.37833
1380	12	2	27	2	0.13493	2.37833
1381	13	2	27	2	0.15347	2.37833
1382	14	2	27	2	0.1581	2.37833
1383	15	2	27	2	0.14111	2.37833
1384	16	2	27	2	0.13566	2.37833
1385	17	2	27	2	0.13184	2.37833
1386	18	2	27	2	0.10807	2.37833
1387	19	2	27	2	0.09486	2.37833
1388	20	2	27	2	0.0927	2.37833
1389	21	2	27	2	0.09579	2.37833
1390	22	2	27	2	0.09898	2.37833
1391	23	2	27	2	0.0969	2.37833
1392	24	2	27	2	0.09384	2.37833
1393	1	3	28	2	0.10094	6.78747
1394	2	3	28	2	0.11124	6.78747
1395	3	3	28	2	0.11227	6.78747
1396	4	3	28	2	0.11118	6.78747
1397	5	3	28	2	0.1111	6.78747
1398	6	3	28	2	0.0918	6.78747
1399	7	3	28	2	0.08888	6.78747
1400	8	3	28	2	0.1616	6.78747
1401	9	3	28	2	0.38556	6.78747
1402	10	3	28	2	0.28866	6.78747
1403	11	3	28	2	0.204	6.78747
1404	12	3	28	2	0.15038	6.78747
1405	13	3	28	2	0.18437	6.78747
1406	14	3	28	2	0.47736	6.78747
1407	15	3	28	2	0.42622	6.78747
1408	16	3	28	2	0.41514	6.78747
1409	17	3	28	2	0.42723	6.78747
1410	18	3	28	2	0.44574	6.78747
1411	19	3	28	2	0.43329	6.78747
1412	20	3	28	2	0.41208	6.78747
1413	21	3	28	2	0.41921	6.78747
1414	22	3	28	2	0.41616	6.78747
1415	23	3	28	2	0.4131	6.78747
1416	24	3	28	2	0.39996	6.78747
1417	1	4	1	3	0.38728	9.58446
1418	2	4	1	3	0.38728	9.58446
1419	3	4	1	3	0.37976	9.58446
1420	4	4	1	3	0.38556	9.58446
1421	5	4	1	3	0.38934	9.58446
1422	6	4	1	3	0.3876	9.58446
1423	7	4	1	3	0.3978	9.58446
1424	8	4	1	3	0.42126	9.58446
1425	9	4	1	3	0.41915	9.58446
1426	10	4	1	3	0.4131	9.58446
1427	11	4	1	3	0.44908	9.58446
1428	12	4	1	3	0.44541	9.58446
1429	13	4	1	3	0.4343	9.58446
1430	14	4	1	3	0.43248	9.58446
1431	15	4	1	3	0.42333	9.58446
1432	16	4	1	3	0.3914	9.58446
1433	17	4	1	3	0.3927	9.58446
1434	18	4	1	3	0.38582	9.58446
1435	19	4	1	3	0.38178	9.58446
1436	20	4	1	3	0.38352	9.58446
1437	21	4	1	3	0.38046	9.58446
1438	22	4	1	3	0.3838	9.58446
1439	23	4	1	3	0.36865	9.58446
1440	24	4	1	3	0.3636	9.58446
1441	1	5	2	3	0.3636	7.17715
1442	2	5	2	3	0.3672	7.17715
1443	3	5	2	3	0.3708	7.17715
1444	4	5	2	3	0.3672	7.17715
1445	5	5	2	3	0.36618	7.17715
1446	6	5	2	3	0.36966	7.17715
1447	7	5	2	3	0.37673	7.17715
1448	8	5	2	3	0.38986	7.17715
1449	9	5	2	3	0.43531	7.17715
1450	10	5	2	3	0.45084	7.17715
1451	11	5	2	3	0.44743	7.17715
1452	12	5	2	3	0.44599	7.17715
1453	13	5	2	3	0.4182	7.17715
1454	14	5	2	3	0.42521	7.17715
1455	15	5	2	3	0.40188	7.17715
1456	16	5	2	3	0.38316	7.17715
1457	17	5	2	3	0.36516	7.17715
1458	18	5	2	3	0.25704	7.17715
1459	19	5	2	3	0.0306	7.17715
1460	20	5	2	3	0.0303	7.17715
1461	21	5	2	3	0.02856	7.17715
1462	22	5	2	3	0.02884	7.17715
1463	23	5	2	3	0.02884	7.17715
1464	24	5	2	3	0.02856	7.17715
1465	1	6	3	3	0.02754	0.62889
1466	2	6	3	3	0.02626	0.62889
1467	3	6	3	3	0.02678	0.62889
1468	4	6	3	3	0.02652	0.62889
1469	5	6	3	3	0.02678	0.62889
1470	6	6	3	3	0.02678	0.62889
1471	7	6	3	3	0.02856	0.62889
1472	8	6	3	3	0.02781	0.62889
1473	9	6	3	3	0.02781	0.62889
1474	10	6	3	3	0.0255	0.62889
1475	11	6	3	3	0.02424	0.62889
1476	12	6	3	3	0.02678	0.62889
1477	13	6	3	3	0.02448	0.62889
1478	14	6	3	3	0.02346	0.62889
1479	15	6	3	3	0.02266	0.62889
1480	16	6	3	3	0.02222	0.62889
1481	17	6	3	3	0.02266	0.62889
1482	18	6	3	3	0.02448	0.62889
1483	19	6	3	3	0.02987	0.62889
1484	20	6	3	3	0.02781	0.62889
1485	21	6	3	3	0.02754	0.62889
1486	22	6	3	3	0.02727	0.62889
1487	23	6	3	3	0.02754	0.62889
1488	24	6	3	3	0.02754	0.62889
1489	1	7	4	3	0.02754	0.60028
1490	2	7	4	3	0.02525	0.60028
1491	3	7	4	3	0.02884	0.60028
1492	4	7	4	3	0.02856	0.60028
1493	5	7	4	3	0.02626	0.60028
1494	6	7	4	3	0.02448	0.60028
1495	7	7	4	3	0.02754	0.60028
1496	8	7	4	3	0.02346	0.60028
1497	9	7	4	3	0.02121	0.60028
1498	10	7	4	3	0.02163	0.60028
1499	11	7	4	3	0.02142	0.60028
1500	12	7	4	3	0.02424	0.60028
1501	13	7	4	3	0.02424	0.60028
1502	14	7	4	3	0.02244	0.60028
1503	15	7	4	3	0.0204	0.60028
1504	16	7	4	3	0.0206	0.60028
1505	17	7	4	3	0.02163	0.60028
1506	18	7	4	3	0.02121	0.60028
1507	19	7	4	3	0.02244	0.60028
1508	20	7	4	3	0.02828	0.60028
1509	21	7	4	3	0.02987	0.60028
1510	22	7	4	3	0.02929	0.60028
1511	23	7	4	3	0.02987	0.60028
1512	24	7	4	3	0.02958	0.60028
1513	1	1	5	3	0.02987	1.16045
1514	2	1	5	3	0.02958	1.16045
1515	3	1	5	3	0.02884	1.16045
1516	4	1	5	3	0.02987	1.16045
1517	5	1	5	3	0.02856	1.16045
1518	6	1	5	3	0.0303	1.16045
1519	7	1	5	3	0.04692	1.16045
1520	8	1	5	3	0.06901	1.16045
1521	9	1	5	3	0.0663	1.16045
1522	10	1	5	3	0.07519	1.16045
1523	11	1	5	3	0.0969	1.16045
1524	12	1	5	3	0.08989	1.16045
1525	13	1	5	3	0.08446	1.16045
1526	14	1	5	3	0.08549	1.16045
1527	15	1	5	3	0.06666	1.16045
1528	16	1	5	3	0.03737	1.16045
1529	17	1	5	3	0.03264	1.16045
1530	18	1	5	3	0.03535	1.16045
1531	19	1	5	3	0.03264	1.16045
1532	20	1	5	3	0.03333	1.16045
1533	21	1	5	3	0.03232	1.16045
1534	22	1	5	3	0.03366	1.16045
1535	23	1	5	3	0.03399	1.16045
1536	24	1	5	3	0.03131	1.16045
1537	1	2	6	3	0.03131	1.31061
1538	2	2	6	3	0.03434	1.31061
1539	3	2	6	3	0.03434	1.31061
1540	4	2	6	3	0.03232	1.31061
1541	5	2	6	3	0.03131	1.31061
1542	6	2	6	3	0.03434	1.31061
1543	7	2	6	3	0.05047	1.31061
1544	8	2	6	3	0.0918	1.31061
1545	9	2	6	3	0.1071	1.31061
1546	10	2	6	3	0.10403	1.31061
1547	11	2	6	3	0.1071	1.31061
1548	12	2	6	3	0.09898	1.31061
1549	13	2	6	3	0.09682	1.31061
1550	14	2	6	3	0.09476	1.31061
1551	15	2	6	3	0.08058	1.31061
1552	16	2	6	3	0.05562	1.31061
1553	17	2	6	3	0.03399	1.31061
1554	18	2	6	3	0.02652	1.31061
1555	19	2	6	3	0.0255	1.31061
1556	20	2	6	3	0.02727	1.31061
1557	21	2	6	3	0.02727	1.31061
1558	22	2	6	3	0.0303	1.31061
1559	23	2	6	3	0.02727	1.31061
1560	24	2	6	3	0.02727	1.31061
1561	1	3	7	3	0.02652	1.60732
1562	2	3	7	3	0.02727	1.60732
1563	3	3	7	3	0.02448	1.60732
1564	4	3	7	3	0.02472	1.60732
1565	5	3	7	3	0.02472	1.60732
1566	6	3	7	3	0.02424	1.60732
1567	7	3	7	3	0.03366	1.60732
1568	8	3	7	3	0.0606	1.60732
1569	9	3	7	3	0.07107	1.60732
1570	10	3	7	3	0.07931	1.60732
1571	11	3	7	3	0.08058	1.60732
1572	12	3	7	3	0.07548	1.60732
1573	13	3	7	3	0.07725	1.60732
1574	14	3	7	3	0.0867	1.60732
1575	15	3	7	3	0.07272	1.60732
1576	16	3	7	3	0.08755	1.60732
1577	17	3	7	3	0.08549	1.60732
1578	18	3	7	3	0.08568	1.60732
1579	19	3	7	3	0.08585	1.60732
1580	20	3	7	3	0.10403	1.60732
1581	21	3	7	3	0.10712	1.60732
1582	22	3	7	3	0.08755	1.60732
1583	23	3	7	3	0.08888	1.60732
1584	24	3	7	3	0.08585	1.60732
1585	1	4	8	3	0.08652	7.55321
1586	2	4	8	3	0.08686	7.55321
1587	3	4	8	3	0.08772	7.55321
1588	4	4	8	3	0.0927	7.55321
1589	5	4	8	3	0.09078	7.55321
1590	6	4	8	3	0.11118	7.55321
1591	7	4	8	3	0.12423	7.55321
1592	8	4	8	3	0.29458	7.55321
1593	9	4	8	3	0.43758	7.55321
1594	10	4	8	3	0.44187	7.55321
1595	11	4	8	3	0.43026	7.55321
1596	12	4	8	3	0.4429	7.55321
1597	13	4	8	3	0.43775	7.55321
1598	14	4	8	3	0.42521	7.55321
1599	15	4	8	3	0.41814	7.55321
1600	16	4	8	3	0.4343	7.55321
1601	17	4	8	3	0.40501	7.55321
1602	18	4	8	3	0.39474	7.55321
1603	19	4	8	3	0.38148	7.55321
1604	20	4	8	3	0.37269	7.55321
1605	21	4	8	3	0.37638	7.55321
1606	22	4	8	3	0.37976	7.55321
1607	23	4	8	3	0.40685	7.55321
1608	24	4	8	3	0.39372	7.55321
1609	1	5	9	3	0.3876	7.09297
1610	2	5	9	3	0.38556	7.09297
1611	3	5	9	3	0.38279	7.09297
1612	4	5	9	3	0.38077	7.09297
1613	5	5	9	3	0.38178	7.09297
1614	6	5	9	3	0.37976	7.09297
1615	7	5	9	3	0.3939	7.09297
1616	8	5	9	3	0.39188	7.09297
1617	9	5	9	3	0.42738	7.09297
1618	10	5	9	3	0.43656	7.09297
1619	11	5	9	3	0.44166	7.09297
1620	12	5	9	3	0.43935	7.09297
1621	13	5	9	3	0.43044	7.09297
1622	14	5	9	3	0.40198	7.09297
1623	15	5	9	3	0.40685	7.09297
1624	16	5	9	3	0.3876	7.09297
1625	17	5	9	3	0.37638	7.09297
1626	18	5	9	3	0.08585	7.09297
1627	19	5	9	3	0.0303	7.09297
1628	20	5	9	3	0.02828	7.09297
1629	21	5	9	3	0.02828	7.09297
1630	22	5	9	3	0.0309	7.09297
1631	23	5	9	3	0.02828	7.09297
1632	24	5	9	3	0.02884	7.09297
1633	1	6	10	3	0.02727	0.62178
1634	2	6	10	3	0.02781	0.62178
1635	3	6	10	3	0.0255	0.62178
1636	4	6	10	3	0.02525	0.62178
1637	5	6	10	3	0.02525	0.62178
1638	6	6	10	3	0.02346	0.62178
1639	7	6	10	3	0.02142	0.62178
1640	8	6	10	3	0.02424	0.62178
1641	9	6	10	3	0.02323	0.62178
1642	10	6	10	3	0.02424	0.62178
1643	11	6	10	3	0.02652	0.62178
1644	12	6	10	3	0.02424	0.62178
1645	13	6	10	3	0.02244	0.62178
1646	14	6	10	3	0.02222	0.62178
1647	15	6	10	3	0.0206	0.62178
1648	16	6	10	3	0.0206	0.62178
1649	17	6	10	3	0.02369	0.62178
1650	18	6	10	3	0.02369	0.62178
1651	19	6	10	3	0.02828	0.62178
1652	20	6	10	3	0.03333	0.62178
1653	21	6	10	3	0.03193	0.62178
1654	22	6	10	3	0.03232	0.62178
1655	23	6	10	3	0.03193	0.62178
1656	24	6	10	3	0.03232	0.62178
1657	1	7	11	3	0.03193	0.65231
1658	2	7	11	3	0.03366	0.65231
1659	3	7	11	3	0.03193	0.65231
1660	4	7	11	3	0.03366	0.65231
1661	5	7	11	3	0.03131	0.65231
1662	6	7	11	3	0.03399	0.65231
1663	7	7	11	3	0.02678	0.65231
1664	8	7	11	3	0.02369	0.65231
1665	9	7	11	3	0.02754	0.65231
1666	10	7	11	3	0.02346	0.65231
1667	11	7	11	3	0.02369	0.65231
1668	12	7	11	3	0.02575	0.65231
1669	13	7	11	3	0.0255	0.65231
1670	14	7	11	3	0.02266	0.65231
1671	15	7	11	3	0.0206	0.65231
1672	16	7	11	3	0.0206	0.65231
1673	17	7	11	3	0.0202	0.65231
1674	18	7	11	3	0.02222	0.65231
1675	19	7	11	3	0.03193	0.65231
1676	20	7	11	3	0.02929	0.65231
1677	21	7	11	3	0.02781	0.65231
1678	22	7	11	3	0.02727	0.65231
1679	23	7	11	3	0.02856	0.65231
1680	24	7	11	3	0.02828	0.65231
1681	1	1	12	3	0.02884	1.49301
1682	2	1	12	3	0.02828	1.49301
1683	3	1	12	3	0.03162	1.49301
1684	4	1	12	3	0.03193	1.49301
1685	5	1	12	3	0.02958	1.49301
1686	6	1	12	3	0.02929	1.49301
1687	7	1	12	3	0.04738	1.49301
1688	8	1	12	3	0.07344	1.49301
1689	9	1	12	3	0.09486	1.49301
1690	10	1	12	3	0.09595	1.49301
1691	11	1	12	3	0.09494	1.49301
1692	12	1	12	3	0.08772	1.49301
1693	13	1	12	3	0.09486	1.49301
1694	14	1	12	3	0.11433	1.49301
1695	15	1	12	3	0.11615	1.49301
1696	16	1	12	3	0.08888	1.49301
1697	17	1	12	3	0.05871	1.49301
1698	18	1	12	3	0.05814	1.49301
1699	19	1	12	3	0.05555	1.49301
1700	20	1	12	3	0.04794	1.49301
1701	21	1	12	3	0.04635	1.49301
1702	22	1	12	3	0.04692	1.49301
1703	23	1	12	3	0.04545	1.49301
1704	24	1	12	3	0.0459	1.49301
1705	1	2	13	3	0.04223	2.16727
1706	2	2	13	3	0.04141	2.16727
1707	3	2	13	3	0.04182	2.16727
1708	4	2	13	3	0.04429	2.16727
1709	5	2	13	3	0.0459	2.16727
1710	6	2	13	3	0.04444	2.16727
1711	7	2	13	3	0.05353	2.16727
1712	8	2	13	3	0.09898	2.16727
1713	9	2	13	3	0.1111	2.16727
1714	10	2	13	3	0.12019	2.16727
1715	11	2	13	3	0.11628	2.16727
1716	12	2	13	3	0.11124	2.16727
1717	13	2	13	3	0.08585	2.16727
1718	14	2	13	3	0.102	2.16727
1719	15	2	13	3	0.12154	2.16727
1720	16	2	13	3	0.12954	2.16727
1721	17	2	13	3	0.13056	2.16727
1722	18	2	13	3	0.13362	2.16727
1723	19	2	13	3	0.10807	2.16727
1724	20	2	13	3	0.11021	2.16727
1725	21	2	13	3	0.10302	2.16727
1726	22	2	13	3	0.08989	2.16727
1727	23	2	13	3	0.08976	2.16727
1728	24	2	13	3	0.0918	2.16727
1729	1	3	14	3	0.0927	7.92632
1730	2	3	14	3	0.09384	7.92632
1731	3	3	14	3	0.09384	7.92632
1732	4	3	14	3	0.0918	7.92632
1733	5	3	14	3	0.0867	7.92632
1734	6	3	14	3	0.0927	7.92632
1735	7	3	14	3	0.09894	7.92632
1736	8	3	14	3	0.14317	7.92632
1737	9	3	14	3	0.42333	7.92632
1738	10	3	14	3	0.47483	7.92632
1739	11	3	14	3	0.49749	7.92632
1740	12	3	14	3	0.47672	7.92632
1741	13	3	14	3	0.47124	7.92632
1742	14	3	14	3	0.4646	7.92632
1743	15	3	14	3	0.46308	7.92632
1744	16	3	14	3	0.46104	7.92632
1745	17	3	14	3	0.459	7.92632
1746	18	3	14	3	0.45046	7.92632
1747	19	3	14	3	0.42024	7.92632
1748	20	3	14	3	0.42024	7.92632
1749	21	3	14	3	0.41208	7.92632
1750	22	3	14	3	0.41412	7.92632
1751	23	3	14	3	0.41208	7.92632
1752	24	3	14	3	0.41208	7.92632
1753	1	4	15	3	0.41921	9.89188
1754	2	4	15	3	0.4223	9.89188
1755	3	4	15	3	0.42024	9.89188
1756	4	4	15	3	0.42126	9.89188
1757	5	4	15	3	0.42024	9.89188
1758	6	4	15	3	0.4182	9.89188
1759	7	4	15	3	0.42218	9.89188
1760	8	4	15	3	0.44541	9.89188
1761	9	4	15	3	0.46512	9.89188
1762	10	4	15	3	0.44945	9.89188
1763	11	4	15	3	0.43026	9.89188
1764	12	4	15	3	0.42228	9.89188
1765	13	4	15	3	0.41715	9.89188
1766	14	4	15	3	0.34093	9.89188
1767	15	4	15	3	0.44908	9.89188
1768	16	4	15	3	0.41097	9.89188
1769	17	4	15	3	0.39474	9.89188
1770	18	4	15	3	0.39758	9.89188
1771	19	4	15	3	0.38556	9.89188
1772	20	4	15	3	0.38556	9.89188
1773	21	4	15	3	0.38582	9.89188
1774	22	4	15	3	0.3876	9.89188
1775	23	4	15	3	0.3914	9.89188
1776	24	4	15	3	0.38934	9.89188
1777	1	5	16	3	0.3774	3.1274
1778	2	5	16	3	0.3825	3.1274
1779	3	5	16	3	0.38831	3.1274
1780	4	5	16	3	0.38862	3.1274
1781	5	5	16	3	0.11526	3.1274
1782	6	5	16	3	0.04545	3.1274
1783	7	5	16	3	0.05757	3.1274
1784	8	5	16	3	0.09486	3.1274
1785	9	5	16	3	0.13534	3.1274
1786	10	5	16	3	0.11817	3.1274
1787	11	5	16	3	0.12875	3.1274
1788	12	5	16	3	0.12154	3.1274
1789	13	5	16	3	0.1212	3.1274
1790	14	5	16	3	0.09792	3.1274
1791	15	5	16	3	0.05253	3.1274
1792	16	5	16	3	0.08652	3.1274
1793	17	5	16	3	0.08568	3.1274
1794	18	5	16	3	0.0714	3.1274
1795	19	5	16	3	0.07107	3.1274
1796	20	5	16	3	0.06464	3.1274
1797	21	5	16	3	0.0408	3.1274
1798	22	5	16	3	0.02781	3.1274
1799	23	5	16	3	0.02652	3.1274
1800	24	5	16	3	0.02754	3.1274
1801	1	6	17	3	0.02678	0.59866
1802	2	6	17	3	0.02678	0.59866
1803	3	6	17	3	0.02652	0.59866
1804	4	6	17	3	0.02884	0.59866
1805	5	6	17	3	0.0255	0.59866
1806	6	6	17	3	0.02678	0.59866
1807	7	6	17	3	0.02856	0.59866
1808	8	6	17	3	0.02369	0.59866
1809	9	6	17	3	0.02525	0.59866
1810	10	6	17	3	0.02222	0.59866
1811	11	6	17	3	0.02244	0.59866
1812	12	6	17	3	0.02323	0.59866
1813	13	6	17	3	0.02369	0.59866
1814	14	6	17	3	0.02266	0.59866
1815	15	6	17	3	0.02121	0.59866
1816	16	6	17	3	0.0204	0.59866
1817	17	6	17	3	0.01919	0.59866
1818	18	6	17	3	0.02222	0.59866
1819	19	6	17	3	0.02525	0.59866
1820	20	6	17	3	0.02727	0.59866
1821	21	6	17	3	0.02781	0.59866
1822	22	6	17	3	0.02626	0.59866
1823	23	6	17	3	0.02727	0.59866
1824	24	6	17	3	0.02884	0.59866
1825	1	7	18	3	0.03162	0.59115
1826	2	7	18	3	0.02856	0.59115
1827	3	7	18	3	0.02884	0.59115
1828	4	7	18	3	0.02856	0.59115
1829	5	7	18	3	0.02884	0.59115
1830	6	7	18	3	0.02884	0.59115
1831	7	7	18	3	0.0309	0.59115
1832	8	7	18	3	0.02323	0.59115
1833	9	7	18	3	0.02244	0.59115
1834	10	7	18	3	0.02346	0.59115
1835	11	7	18	3	0.02142	0.59115
1836	12	7	18	3	0.02266	0.59115
1837	13	7	18	3	0.02142	0.59115
1838	14	7	18	3	0.02142	0.59115
1839	15	7	18	3	0.01938	0.59115
1840	16	7	18	3	0.01957	0.59115
1841	17	7	18	3	0.01818	0.59115
1842	18	7	18	3	0.01957	0.59115
1843	19	7	18	3	0.02424	0.59115
1844	20	7	18	3	0.02525	0.59115
1845	21	7	18	3	0.02575	0.59115
1846	22	7	18	3	0.02575	0.59115
1847	23	7	18	3	0.0255	0.59115
1848	24	7	18	3	0.02575	0.59115
1849	1	1	19	3	0.02575	1.35982
1850	2	1	19	3	0.02856	1.35982
1851	3	1	19	3	0.02958	1.35982
1852	4	1	19	3	0.02626	1.35982
1853	5	1	19	3	0.02575	1.35982
1854	6	1	19	3	0.02575	1.35982
1855	7	1	19	3	0.04343	1.35982
1856	8	1	19	3	0.08262	1.35982
1857	9	1	19	3	0.08755	1.35982
1858	10	1	19	3	0.13287	1.35982
1859	11	1	19	3	0.14039	1.35982
1860	12	1	19	3	0.11433	1.35982
1861	13	1	19	3	0.08976	1.35982
1862	14	1	19	3	0.09282	1.35982
1863	15	1	19	3	0.0707	1.35982
1864	16	1	19	3	0.06018	1.35982
1865	17	1	19	3	0.05871	1.35982
1866	18	1	19	3	0.03232	1.35982
1867	19	1	19	3	0.02929	1.35982
1868	20	1	19	3	0.03232	1.35982
1869	21	1	19	3	0.03264	1.35982
1870	22	1	19	3	0.03264	1.35982
1871	23	1	19	3	0.03296	1.35982
1872	24	1	19	3	0.03264	1.35982
1873	1	2	20	3	0.02781	1.34667
1874	2	2	20	3	0.02828	1.34667
1875	3	2	20	3	0.02754	1.34667
1876	4	2	20	3	0.02958	1.34667
1877	5	2	20	3	0.02781	1.34667
1878	6	2	20	3	0.02828	1.34667
1879	7	2	20	3	0.04284	1.34667
1880	8	2	20	3	0.07622	1.34667
1881	9	2	20	3	0.12625	1.34667
1882	10	2	20	3	0.11514	1.34667
1883	11	2	20	3	0.09282	1.34667
1884	12	2	20	3	0.08989	1.34667
1885	13	2	20	3	0.08787	1.34667
1886	14	2	20	3	0.09191	1.34667
1887	15	2	20	3	0.07272	1.34667
1888	16	2	20	3	0.05757	1.34667
1889	17	2	20	3	0.03939	1.34667
1890	18	2	20	3	0.04017	1.34667
1891	19	2	20	3	0.04017	1.34667
1892	20	2	20	3	0.0408	1.34667
1893	21	2	20	3	0.04223	1.34667
1894	22	2	20	3	0.04284	1.34667
1895	23	2	20	3	0.0408	1.34667
1896	24	2	20	3	0.03774	1.34667
1897	1	3	21	3	0.03838	1.96874
1898	2	3	21	3	0.03939	1.96874
1899	3	3	21	3	0.04223	1.96874
1900	4	3	21	3	0.03939	1.96874
1901	5	3	21	3	0.03811	1.96874
1902	6	3	21	3	0.03876	1.96874
1903	7	3	21	3	0.0515	1.96874
1904	8	3	21	3	0.10812	1.96874
1905	9	3	21	3	0.13837	1.96874
1906	10	3	21	3	0.12928	1.96874
1907	11	3	21	3	0.13905	1.96874
1908	12	3	21	3	0.10605	1.96874
1909	13	3	21	3	0.08888	1.96874
1910	14	3	21	3	0.11433	1.96874
1911	15	3	21	3	0.10712	1.96874
1912	16	3	21	3	0.08755	1.96874
1913	17	3	21	3	0.07931	1.96874
1914	18	3	21	3	0.08383	1.96874
1915	19	3	21	3	0.08181	1.96874
1916	20	3	21	3	0.0816	1.96874
1917	21	3	21	3	0.08466	1.96874
1918	22	3	21	3	0.08568	1.96874
1919	23	3	21	3	0.08858	1.96874
1920	24	3	21	3	0.07676	1.96874
1921	1	4	22	3	0.07725	7.16935
1922	2	4	22	3	0.07676	7.16935
1923	3	4	22	3	0.07854	7.16935
1924	4	4	22	3	0.07854	7.16935
1925	5	4	22	3	0.07828	7.16935
1926	6	4	22	3	0.07979	7.16935
1927	7	4	22	3	0.09191	7.16935
1928	8	4	22	3	0.15965	7.16935
1929	9	4	22	3	0.34608	7.16935
1930	10	4	22	3	0.41814	7.16935
1931	11	4	22	3	0.4242	7.16935
1932	12	4	22	3	0.42539	7.16935
1933	13	4	22	3	0.45629	7.16935
1934	14	4	22	3	0.39491	7.16935
1935	15	4	22	3	0.40788	7.16935
1936	16	4	22	3	0.41922	7.16935
1937	17	4	22	3	0.41303	7.16935
1938	18	4	22	3	0.41303	7.16935
1939	19	4	22	3	0.39168	7.16935
1940	20	4	22	3	0.3838	7.16935
1941	21	4	22	3	0.38964	7.16935
1942	22	4	22	3	0.38784	7.16935
1943	23	4	22	3	0.38582	7.16935
1944	24	4	22	3	0.39168	7.16935
1945	1	5	23	3	0.38862	5.23651
1946	2	5	23	3	0.38178	5.23651
1947	3	5	23	3	0.38658	5.23651
1948	4	5	23	3	0.38481	5.23651
1949	5	5	23	3	0.38556	5.23651
1950	6	5	23	3	0.38279	5.23651
1951	7	5	23	3	0.38831	5.23651
1952	8	5	23	3	0.39693	5.23651
1953	9	5	23	3	0.41208	5.23651
1954	10	5	23	3	0.41514	5.23651
1955	11	5	23	3	0.40299	5.23651
1956	12	5	23	3	0.37389	5.23651
1957	13	5	23	3	0.09797	5.23651
1958	14	5	23	3	0.06901	5.23651
1959	15	5	23	3	0.05871	5.23651
1960	16	5	23	3	0.04343	5.23651
1961	17	5	23	3	0.03838	5.23651
1962	18	5	23	3	0.04017	5.23651
1963	19	5	23	3	0.03605	5.23651
1964	20	5	23	3	0.03162	5.23651
1965	21	5	23	3	0.0309	5.23651
1966	22	5	23	3	0.0309	5.23651
1967	23	5	23	3	0.0306	5.23651
1968	24	5	23	3	0.02929	5.23651
1969	1	6	24	3	0.0306	0.64002
1970	2	6	24	3	0.03264	0.64002
1971	3	6	24	3	0.03232	0.64002
1972	4	6	24	3	0.02884	0.64002
1973	5	6	24	3	0.02884	0.64002
1974	6	6	24	3	0.02856	0.64002
1975	7	6	24	3	0.03131	0.64002
1976	8	6	24	3	0.02575	0.64002
1977	9	6	24	3	0.02424	0.64002
1978	10	6	24	3	0.0255	0.64002
1979	11	6	24	3	0.02525	0.64002
1980	12	6	24	3	0.02678	0.64002
1981	13	6	24	3	0.02525	0.64002
1982	14	6	24	3	0.02424	0.64002
1983	15	6	24	3	0.02369	0.64002
1984	16	6	24	3	0.02222	0.64002
1985	17	6	24	3	0.02244	0.64002
1986	18	6	24	3	0.02346	0.64002
1987	19	6	24	3	0.0255	0.64002
1988	20	6	24	3	0.02525	0.64002
1989	21	6	24	3	0.02678	0.64002
1990	22	6	24	3	0.02727	0.64002
1991	23	6	24	3	0.02754	0.64002
1992	24	6	24	3	0.02575	0.64002
1993	1	7	25	3	0.02575	0.5951
1994	2	7	25	3	0.02448	0.5951
1995	3	7	25	3	0.02448	0.5951
1996	4	7	25	3	0.02472	0.5951
1997	5	7	25	3	0.02424	0.5951
1998	6	7	25	3	0.02424	0.5951
1999	7	7	25	3	0.02652	0.5951
[truncated: 6,017 more rows]

## Sheet: December Real and Forecasted
The time moment	December Real	December Forecasted by the Developed METHOD	Δ = Real - Forecasted (MWh)	Percentage Differences (PD)
1	0.13716	0.134479	0.00268109	0.0197401
2	0.01496	0.0152684	-0.000308355	0.0204017
3	0.05345	0.0524104	0.00103962	0.0196413
4	0.06119	0.059414	0.00177599	0.0294515
5	0.04072	0.0419861	-0.00126607	0.0306161
6	0.01546	0.0151612	0.000298801	0.0195159
7	0.01668	0.0163567	0.000323331	0.0195741
8	0.04997	0.0489955	0.00097448	0.0196933
9	0.07877	0.0812149	-0.00244493	0.0305645
10	0.10996	0.112211	-0.00225102	0.0202638
11	0.13745	0.141708	-0.00425823	0.0305076
12	0.17476	0.169676	0.00508405	0.029521
13	0.19229	0.196222	-0.00393178	0.0202402
14	0.22815	0.221509	0.00664071	0.0295366
15	0.23835	0.245723	-0.00737262	0.0304608
16	0.26365	0.269039	-0.00538933	0.0202344
17	0.28287	0.291628	-0.00875826	0.0304901
18	0.32304	0.313639	0.00940102	0.0295314
19	0.32849	0.335202	-0.00671183	0.0202258
20	0.36356	0.356434	0.0071264	0.0197957
21	0.3661	0.377432	-0.0113322	0.0304822
22	0.38633	0.398286	-0.0119561	0.0304764
23	0.40649	0.419068	-0.0125778	0.0304711
24	0.43104	0.439845	-0.00880473	0.0202202
25	0.45146	0.460674	-0.00921411	0.0202034
26	0.20069	0.204786	-0.00409639	0.0202053
27	0.16952	0.166201	0.00331897	0.0197722
28	0.12268	0.125193	-0.00251264	0.0202736
29	0.11363	0.11595	-0.00232011	0.0202117
30	0.11265	0.116136	-0.00348643	0.0304776
31	0.12214	0.124641	-0.00250068	0.0202664
32	0.14004	0.137303	0.00273698	0.0197371
33	0.15719	0.15262	0.00456979	0.0295006
34	0.17448	0.169407	0.00507303	0.0295041
35	0.19077	0.187039	0.00373127	0.0197522
36	0.20923	0.205129	0.00410115	0.0197952
37	0.22793	0.223461	0.00446916	0.0198017
38	0.23466	0.241918	-0.00725792	0.0304585
39	0.26564	0.260441	0.00519896	0.0197649
40	0.27342	0.279009	-0.00558921	0.020235
41	0.29166	0.297621	-0.00596112	0.0202318
42	0.32577	0.31629	0.00947967	0.0295289
43	0.32498	0.335033	-0.0100534	0.0304644
44	0.34325	0.353873	-0.0106232	0.0304773
45	0.36537	0.372832	-0.00746197	0.0202166
46	0.38017	0.391936	-0.0117664	0.0304786
47	0.42354	0.411207	0.0123326	0.0295481
48	0.42205	0.43067	-0.00862042	0.0202186
49	0.46385	0.450348	0.0135022	0.029539
50	0.19374	0.189949	0.00379057	0.0197585
51	0.15547	0.150948	0.00452186	0.0295143
52	0.11845	0.115006	0.00344418	0.0295061
53	0.10795	0.111291	-0.00334079	0.030476
54	0.114	0.117533	-0.00353252	0.0305142
55	0.12925	0.131894	-0.00264405	0.0202497
56	0.15307	0.150076	0.00299398	0.0197527
57	0.17386	0.170461	0.0033994	0.0197456
58	0.19569	0.191858	0.00383188	0.019775
59	0.20725	0.21367	-0.00641984	0.0305039
60	0.23084	0.235553	-0.00471285	0.0202098
61	0.25219	0.257342	-0.00515183	0.0202218
62	0.27059	0.278969	-0.00837898	0.0304935
63	0.29141	0.300424	-0.00901424	0.030462
64	0.31207	0.321726	-0.00965642	0.0304717
65	0.35319	0.342911	0.0102786	0.029532
66	0.3713	0.364021	0.00727888	0.0197978
67	0.39665	0.3851	0.0115502	0.0295496
68	0.41431	0.406191	0.00811926	0.019791
69	0.43588	0.427337	0.00854323	0.0197939
70	0.4396	0.448576	-0.00897554	0.0202112
71	0.46054	0.469944	-0.00940376	0.0202126
72	0.5013	0.491476	0.00982356	0.0197901
73	0.50294	0.513206	-0.0102659	0.0202056
74	0.28576	0.277439	0.00832139	0.0295505
75	0.24978	0.244887	0.00489276	0.019782
76	0.19931	0.205477	-0.006167	0.0304703
77	0.18777	0.193578	-0.00580787	0.0304597
78	0.18676	0.190575	-0.00381531	0.0202224
79	0.19963	0.195717	0.00391339	0.0197972
80	0.20961	0.205506	0.00410414	0.0197734
81	0.22507	0.218522	0.0065484	0.0295244
82	0.22661	0.233629	-0.00701885	0.0305009
83	0.25515	0.250157	0.00499331	0.0197635
84	0.2623	0.26766	-0.0053603	0.0202291
85	0.27728	0.285859	-0.00857933	0.0304696
86	0.31371	0.304575	0.00913467	0.0295484
87	0.31398	0.323697	-0.00971721	0.0304769
88	0.35345	0.343158	0.0102919	0.0295487
89	0.35203	0.362922	-0.010892	0.0304692
90	0.37531	0.38297	-0.00766024	0.0202043
91	0.39119	0.403298	-0.0121084	0.030481
92	0.43238	0.42391	0.00847003	0.0197831
93	0.43147	0.444816	-0.0133463	0.0304611
94	0.47535	0.466031	0.00931897	0.0197985
95	0.49732	0.487571	0.00974929	0.0197977
96	0.52474	0.509456	0.0152837	0.0295566
97	0.52107	0.531709	-0.0106394	0.020212
98	0.3079	0.301864	0.00603637	0.0197991
99	0.26491	0.27032	-0.00541039	0.0202171
100	0.23733	0.230422	0.00690795	0.0295368
101	0.20965	0.216144	-0.00649362	0.0305012
102	0.20662	0.21084	-0.00422049	0.0202198
103	0.20733	0.213751	-0.00642076	0.0304966
104	0.22834	0.221696	0.00664352	0.0295243
105	0.22626	0.233261	-0.00700146	0.0304728
106	0.24237	0.247322	-0.00495165	0.0202235
107	0.25528	0.263176	-0.00789593	0.0304594
108	0.28595	0.280346	0.00560374	0.0197908
109	0.30448	0.298517	0.00596314	0.0197783
110	0.32382	0.31748	0.00634046	0.0197738
111	0.32698	0.3371	-0.0101196	0.030477
112	0.36443	0.35729	0.00713959	0.0197849
113	0.37043	0.378	-0.00756952	0.0202277
114	0.41117	0.3992	0.0119698	0.0295415
115	0.42929	0.42088	0.00841014	0.0197846
116	0.45633	0.44304	0.0132898	0.0295537
117	0.45171	0.46569	-0.0139799	0.0304772
118	0.50351	0.488845	0.0146652	0.0295564
119	0.52277	0.512527	0.0102429	0.0197873
120	0.52602	0.536765	-0.0107445	0.0202195
121	0.55035	0.561584	-0.0112336	0.0202055
122	0.30032	0.306457	-0.00613734	0.0202293
123	0.26831	0.260501	0.00780904	0.0295343
124	0.20748	0.213899	-0.00641946	0.0304688
125	0.19283	0.196767	-0.00393674	0.0202093
126	0.18528	0.191015	-0.00573487	0.0304807
127	0.1888	0.194648	-0.00584768	0.0305005
128	0.21005	0.203941	0.00610949	0.0295151
129	0.22146	0.217127	0.00433317	0.0197597
130	0.23757	0.232912	0.004658	0.019801
131	0.24549	0.250504	-0.00501352	0.0202161
132	0.26399	0.269381	-0.00539135	0.0202161
133	0.28343	0.289217	-0.00578659	0.02021
134	0.31909	0.309803	0.00928677	0.0295337
135	0.33763	0.331014	0.00661556	0.019788
136	0.34572	0.352778	-0.00705805	0.0202092
137	0.3638	0.375055	-0.0112551	0.0304664
138	0.3859	0.397835	-0.0119352	0.0304572
139	0.40848	0.42112	-0.01264	0.0304725
140	0.45382	0.444924	0.00889564	0.0197957
141	0.45519	0.469273	-0.0140828	0.0304671
142	0.50407	0.494195	0.0098753	0.0197849
143	0.50932	0.519724	-0.0104041	0.0202209
144	0.56227	0.545901	0.0163692	0.0295428
145	0.58995	0.572768	0.0171815	0.029554
146	0.28138	0.275864	0.00551636	0.0197987
147	0.20204	0.208294	-0.00625411	0.030483
148	0.15641	0.153343	0.00306681	0.0198017
149	0.13273	0.135443	-0.00271288	0.0202323
150	0.13589	0.131939	0.0039509	0.0295032
151	0.13634	0.139128	-0.00278817	0.0202432
152	0.1491	0.152152	-0.00305222	0.0202636
153	0.17216	0.168789	0.0033706	0.0197719
154	0.18376	0.187519	-0.00375852	0.0202464
155	0.2137	0.20748	0.00621984	0.0295353
156	0.22131	0.228158	-0.00684821	0.0304725
157	0.25424	0.249257	0.00498299	0.0197935
158	0.2625	0.27062	-0.00812043	0.0304638
159	0.29801	0.292172	0.00583809	0.019784
160	0.32016	0.313883	0.00627697	0.0197998
161	0.34583	0.335759	0.010071	0.0295514
162	0.34708	0.357821	-0.0107409	0.030475
163	0.3915	0.380101	0.0113989	0.0295461
164	0.39458	0.402635	-0.00805534	0.0202087
165	0.43823	0.425467	0.012763	0.0295543
166	0.4576	0.448635	0.00896498	0.0197851
167	0.45801	0.472185	-0.0141749	0.0304772
168	0.51104	0.496159	0.0148811	0.0295494
169	0.50498	0.520601	-0.0156206	0.0304619
170	0.22962	0.225118	0.00450196	0.0198002
171	0.16567	0.162429	0.0032413	0.0197581
172	0.11448	0.111151	0.00332917	0.0295099
173	0.09951	0.097563	0.00194699	0.0197591
174	0.09439	0.0973185	-0.00292851	0.0305517
175	0.10499	0.107137	-0.00214663	0.0202391
176	0.12569	0.122033	0.00365693	0.0295244
177	0.13573	0.139929	-0.00419944	0.0304683
178	0.15459	0.159379	-0.00478891	0.0305056
179	0.17422	0.179615	-0.00539522	0.0304957
180	0.20419	0.20019	0.00399951	0.0197809
181	0.22749	0.220873	0.00661709	0.0295167
182	0.24879	0.241549	0.00724078	0.0295338
183	0.25693	0.262179	-0.00524916	0.0202237
184	0.29124	0.282763	0.00847683	0.0295358
185	0.31242	0.303324	0.00909643	0.0295462
186	0.31418	0.323898	-0.00971753	0.0304588
187	0.33418	0.344524	-0.010344	0.0304815
188	0.35794	0.365247	-0.00730664	0.0202068
189	0.37838	0.386108	-0.00772751	0.0202162
190	0.41529	0.407149	0.00814055	0.0197961
191	0.41984	0.428411	-0.00857096	0.0202085
192	0.46342	0.449932	0.0134882	0.0295356
193	0.48118	0.471749	0.00943077	0.0197932
194	0.2246	0.218067	0.00653326	0.0295177
195	0.17294	0.178297	-0.00535742	0.030506
196	0.13167	0.135749	-0.00407904	0.0305067
197	0.12615	0.123678	0.00247154	0.0197859
198	0.12515	0.121513	0.00363653	0.0294858
199	0.13046	0.127911	0.0025491	0.0197321
200	0.14172	0.138951	0.0027694	0.0197342
201	0.15612	0.153062	0.00305848	0.0197844
202	0.17411	0.169042	0.00506824	0.0295393
203	0.18993	0.186213	0.00371659	0.0197616
204	0.19802	0.204148	-0.00612826	0.0304761
205	0.21591	0.222591	-0.00668091	0.0304716
206	0.23415	0.241393	-0.00724307	0.0304623
207	0.26568	0.260473	0.00520747	0.0197945
208	0.28818	0.279788	0.00839183	0.0295503
209	0.29034	0.299326	-0.00898643	0.0304797
210	0.30951	0.31909	-0.00957994	0.0304803
211	0.34587	0.339091	0.00677949	0.0197953
212	0.35216	0.359348	-0.00718781	0.0202044
213	0.36848	0.379884	-0.0114037	0.0304764
214	0.41274	0.400724	0.0120164	0.0295438
215	0.41345	0.421894	-0.00844412	0.0202171
216	0.45672	0.443423	0.0132967	0.0295435
217	0.45137	0.465339	-0.0139687	0.0304757
218	0.21488	0.210672	0.0042079	0.0197762
219	0.16643	0.171579	-0.00514852	0.0304638
220	0.13828	0.135572	0.0027081	0.0197778
221	0.13295	0.130345	0.00260512	0.0197886
222	0.13286	0.135578	-0.00271759	0.0202475
223	0.14612	0.149106	-0.00298593	0.0202281
224	0.16354	0.166886	-0.00334552	0.0202498
225	0.19096	0.187218	0.00374151	0.019787
226	0.21516	0.208898	0.00626188	0.0295331
227	0.23589	0.231272	0.00461814	0.0197711
228	0.24887	0.253958	-0.00508788	0.0202371
229	0.28229	0.276756	0.00553412	0.0197985
230	0.30856	0.299575	0.00898514	0.0295498
231	0.32883	0.322385	0.00644534	0.0197948
232	0.35555	0.345195	0.0103551	0.0295546
233	0.35699	0.368035	-0.0110449	0.0304676
234	0.40267	0.390947	0.011723	0.0295432
235	0.40569	0.413977	-0.00828726	0.020221
236	0.42405	0.437175	-0.0131246	0.0304789
237	0.45137	0.46059	-0.00922013	0.0202205
238	0.47458	0.484272	-0.00969205	0.0202159
239	0.51843	0.508268	0.010162	0.0197955
240	0.51664	0.532626	-0.0159861	0.030471
241	0.56854	0.557394	0.0111464	0.0197994
242	0.28855	0.29748	-0.00892985	0.0304758
243	0.24509	0.2501	-0.00500983	0.020234
244	0.20745	0.203389	0.00406145	0.0197715
245	0.19305	0.187435	0.00561502	0.029515
246	0.18666	0.183007	0.00365253	0.0197612
247	0.18426	0.188023	-0.00376281	0.0202148
248	0.19258	0.198537	-0.00595722	0.0304626
249	0.22551	0.212747	0.0127626	0.0582424
250	0.2385	0.229333	0.00916745	0.0391911
251	0.26235	0.247502	0.0148477	0.0582432
252	0.28008	0.266751	0.0133294	0.0487516
253	0.27242	0.286765	-0.0143447	0.0513057
254	0.29198	0.307353	-0.0153731	0.0513006
255	0.34154	0.328405	0.0131354	0.0392133
256	0.33586	0.349857	-0.0139968	0.040824
257	0.35681	0.371683	-0.0148726	0.040831
258	0.37024	0.393876	-0.0236357	0.0618641
259	0.39562	0.416445	-0.0208249	0.0512888
260	0.41304	0.439408	-0.0263682	0.0618647
261	0.44427	0.462791	-0.0185205	0.0408364
262	0.46229	0.486622	-0.0243316	0.0512832
263	0.48538	0.510933	-0.0255533	0.0512958
264	0.5679	0.535763	0.0321366	0.0582363
265	0.58359	0.561149	0.0224407	0.0392067
266	0.29318	0.311903	-0.0187235	0.0618873
267	0.2522	0.268298	-0.016098	0.0618561
268	0.21135	0.222478	-0.0111281	0.0513017
269	0.19272	0.205026	-0.0123061	0.061879
270	0.2106	0.198683	0.0119171	0.0582342
271	0.18955	0.201655	-0.0121048	0.0618848
272	0.19986	0.21038	-0.0105199	0.0512867
273	0.23429	0.223138	0.0111515	0.0487574
274	0.2291	0.238654	-0.00955382	0.0408498
275	0.26637	0.256131	0.0102393	0.0391933
276	0.25853	0.275039	-0.0165088	0.0618805
277	0.30683	0.295038	0.0117916	0.0391832
278	0.33486	0.31591	0.0189497	0.0582379
279	0.35776	0.337516	0.020244	0.0582331
280	0.34538	0.359775	-0.0143951	0.0408282
281	0.3635	0.382642	-0.0191418	0.0513087
282	0.38579	0.406098	-0.0203084	0.0512912
283	0.45165	0.430145	0.0215053	0.0487762
284	0.43205	0.454795	-0.0227445	0.0512931
285	0.50407	0.480068	0.024002	0.0487776
286	0.48069	0.505999	-0.0253089	0.0513007
287	0.51131	0.532622	-0.0213122	0.0408306
288	0.53197	0.559979	-0.0280089	0.0513007
289	0.55871	0.588119	-0.0294089	0.0512874
290	0.28418	0.302322	-0.0181424	0.0618665
291	0.22385	0.238146	-0.014296	0.0618881
292	0.17414	0.183309	-0.00916882	0.0513015
293	0.15496	0.163126	-0.00816631	0.0513465
294	0.14766	0.157094	-0.00943408	0.0619128
295	0.1521	0.161809	-0.00970939	0.0618611
296	0.18141	0.172779	0.0086309	0.0487361
297	0.18031	0.18783	-0.00751993	0.0408537
298	0.21367	0.205456	0.00821443	0.039198
299	0.21577	0.224763	-0.00899333	0.0408293
300	0.255	0.245193	0.00980704	0.039213
301	0.25308	0.266408	-0.0133277	0.0513108
302	0.27091	0.288209	-0.0172989	0.0618791
303	0.29496	0.310486	-0.0155264	0.0512891
304	0.31985	0.333186	-0.0133356	0.0408417
305	0.37766	0.356288	0.0213716	0.0582374
306	0.36081	0.3798	-0.0189902	0.0512825
307	0.38355	0.403741	-0.020191	0.0512924
308	0.41101	0.428139	-0.0171294	0.0408255
309	0.43038	0.453033	-0.0226528	0.0512847
310	0.50717	0.478462	0.0287076	0.058252
311	0.4742	0.504472	-0.0302716	0.0618627
312	0.55766	0.531109	0.0265507	0.048772
313	0.59193	0.558426	0.0335042	0.0582502
314	0.2592	0.275748	-0.0165477	0.0618667
315	0.22544	0.214711	0.0107292	0.0487524
316	0.15363	0.161726	-0.00809585	0.0513442
317	0.13737	0.143101	-0.00573082	0.0408657
318	0.14355	0.138032	0.00551788	0.039192
319	0.13619	0.143364	-0.00717412	0.0513254
320	0.16082	0.154643	0.00617695	0.0391611
321	0.17996	0.169782	0.0101782	0.0582041
322	0.17982	0.187321	-0.00750083	0.0408608
323	0.21672	0.206406	0.0103145	0.0487537
324	0.21291	0.226506	-0.0135963	0.0618833
325	0.25967	0.247305	0.012365	0.0487794
326	0.28473	0.268619	0.016111	0.0582308
327	0.27582	0.290347	-0.0145268	0.0513162
328	0.32806	0.312443	0.0156172	0.0487655
329	0.31479	0.334892	-0.0201022	0.0618831
330	0.33624	0.357703	-0.0214629	0.0618577
331	0.39613	0.380895	0.0152351	0.0392139
332	0.42876	0.404499	0.0242615	0.0582327
333	0.45426	0.428549	0.0257113	0.0582488
334	0.47573	0.453085	0.0226447	0.0487605
335	0.45424	0.478149	-0.0239089	0.0512851
336	0.48363	0.503785	-0.0201545	0.0408228
337	0.56184	0.53004	0.0318001	0.0582483
338	0.25978	0.249796	0.00998414	0.0391861
339	0.18193	0.191506	-0.0095756	0.0512838
340	0.13457	0.140178	-0.00560786	0.0408219
341	0.1169	0.12306	-0.00616002	0.051342
342	0.12489	0.118949	0.00594084	0.0487275
343	0.12991	0.124919	0.00499072	0.0391691
344	0.1297	0.136535	-0.00683543	0.0513488
345	0.15937	0.151787	0.00758342	0.0487434
346	0.17602	0.169257	0.00676305	0.0391746
347	0.17872	0.18813	-0.00941041	0.0513038
348	0.19542	0.207904	-0.0124835	0.0619033
349	0.23969	0.228281	0.0114089	0.0487589
350	0.26154	0.249093	0.0124466	0.0487495
351	0.28106	0.270253	0.0108074	0.0392061
352	0.27713	0.291717	-0.0145875	0.0512878
353	0.32601	0.31348	0.0125298	0.0391868
354	0.35568	0.335551	0.0201291	0.0582414
355	0.33647	0.357952	-0.0214822	0.0618706
356	0.39974	0.380713	0.0190266	0.0487578
357	0.42002	0.403869	0.0161513	0.0392074
358	0.4531	0.427455	0.0256451	0.0582477
359	0.47408	0.451512	0.0225675	0.0487634
360	0.50464	0.476083	0.0285573	0.0582372
361	0.52626	0.501206	0.0250542	0.048769
362	0.23616	0.22492	0.0112401	0.0487555
363	0.17697	0.170172	0.00679763	0.0391634
364	0.12683	0.120794	0.006036	0.0487514
365	0.09891	0.10523	-0.00631969	0.0619154
366	0.1071	0.102005	0.00509549	0.0487363
367	0.10198	0.108499	-0.00651904	0.0619448
368	0.11551	0.12033	-0.00481994	0.0408747
369	0.14371	0.13558	0.00812979	0.0582175
370	0.16205	0.152884	0.00916562	0.0582065
371	0.1646	0.171468	-0.0068683	0.0408744
372	0.19848	0.190855	0.00762477	0.0391681
373	0.22341	0.21077	0.0126399	0.0582244
374	0.2195	0.231056	-0.0115562	0.0512976
375	0.26421	0.251636	0.0125737	0.0487497
376	0.25612	0.272474	-0.016354	0.0618774
377	0.3053	0.293566	0.0117342	0.039188
378	0.33066	0.314923	0.0157369	0.0487525
379	0.35339	0.336569	0.0168205	0.0487579
380	0.33702	0.358533	-0.0215134	0.0618599
381	0.36561	0.380848	-0.0152377	0.0408266
382	0.38337	0.403549	-0.020179	0.0512861
383	0.448	0.426673	0.0213272	0.048766
384	0.46826	0.450258	0.0180023	0.0391987
385	0.44588	0.474342	-0.0284624	0.0618598
386	0.21236	0.223544	-0.0111835	0.0513118
387	0.19299	0.183807	0.00918345	0.0487449
388	0.15286	0.146988	0.00587226	0.0391683
389	0.14687	0.139884	0.00698605	0.048725
390	0.15076	0.143586	0.0071737	0.0487433
391	0.16203	0.155805	0.00622529	0.0391731
392	0.16404	0.172683	-0.00864332	0.0513378
393	0.18286	0.19249	-0.00963013	0.0513128
394	0.20116	0.214007	-0.0128475	0.0618906
395	0.246	0.236544	0.00945606	0.0391926
396	0.24929	0.259685	-0.0103948	0.0408461
397	0.30019	0.283201	0.016989	0.0582423
398	0.32232	0.306974	0.0153457	0.0487711
399	0.34419	0.330958	0.013232	0.0391973
400	0.33383	0.355146	-0.021316	0.0618773
401	0.39853	0.37956	0.0189704	0.0487614
402	0.4204	0.404236	0.0161639	0.0392025
403	0.45068	0.429221	0.021459	0.048776
404	0.47274	0.454565	0.0181751	0.0391998
405	0.50914	0.480322	0.0288179	0.0582495
406	0.5268	0.506548	0.0202522	0.0391972
407	0.51196	0.533301	-0.021341	0.0408338
408	0.5326	0.560638	-0.028038	0.0512935
409	0.62393	0.588622	0.0353081	0.0582377
410	0.36674	0.349286	0.0174544	0.0487535
411	0.28952	0.30801	-0.0184896	0.0618867
412	0.24946	0.262592	-0.0131316	0.0512901
413	0.23351	0.243248	-0.0097384	0.0408526
414	0.22322	0.234973	-0.0117529	0.0513011
415	0.24794	0.236137	0.0118033	0.0487661
416	0.25328	0.24354	0.00974031	0.0392106
417	0.24528	0.25551	-0.0102297	0.0408542
418	0.28161	0.270787	0.0108234	0.039187
419	0.27411	0.288545	-0.0144348	0.0513096
420	0.28972	0.308217	-0.0184973	0.0618704
421	0.34919	0.329425	0.019765	0.0582509
422	0.3695	0.351914	0.0175862	0.0487548
423	0.39053	0.375515	0.0150148	0.0392007
424	0.38412	0.400129	-0.0160088	0.0408257
425	0.44697	0.425693	0.0212773	0.0487641
426	0.47026	0.45218	0.0180801	0.0392006
427	0.4556	0.479588	-0.0239882	0.0513014
428	0.47745	0.507934	-0.0304839	0.061872
429	0.56948	0.537246	0.0322339	0.058251
430	0.53919	0.56757	-0.0283803	0.0512854
431	0.6289	0.598961	0.0299391	0.0487662
432	0.65674	0.631485	0.0252548	0.0392087
433	0.63195	0.66522	-0.0332697	0.0512958
434	0.41637	0.400362	0.0160081	0.0392004
435	0.32268	0.339671	-0.0169913	0.0513061
436	0.29523	0.283877	0.0113528	0.0392081
437	0.26826	0.257948	0.010312	0.0391935
438	0.25613	0.246286	0.00984449	0.0391886
439	0.2557	0.245874	0.00982605	0.0391809
440	0.24031	0.252964	-0.0126537	0.0513051
441	0.27606	0.265448	0.0106124	0.0391956
442	0.29591	0.281822	0.0140876	0.0487686
443	0.31314	0.301104	0.0120357	0.0391885
444	0.33876	0.322631	0.0161287	0.0487719
445	0.32866	0.345966	-0.0173055	0.0513042
446	0.35598	0.37082	-0.0148396	0.0408355
447	0.41289	0.397012	0.0158779	0.0392095
448	0.44989	0.424434	0.0254565	0.0582313
449	0.47114	0.453028	0.018112	0.0391964
450	0.50691	0.48278	0.0241303	0.0487633
451	0.48287	0.513701	-0.0308306	0.0618734
452	0.57311	0.545826	0.027284	0.0487678
453	0.55604	0.579212	-0.0231723	0.0408232
454	0.57709	0.613933	-0.0368426	0.0618672
455	0.68908	0.650077	0.039003	0.0582501
456	0.64648	0.687754	-0.0412744	0.0618697
457	0.69073	0.72709	-0.0363598	0.0512897
458	0.41066	0.427772	-0.0171115	0.0408179
459	0.36003	0.342895	0.0171348	0.0487528
460	0.26335	0.274332	-0.010982	0.0408493
461	0.22687	0.241358	-0.0144881	0.0618847
462	0.23976	0.226194	0.0135665	0.058231
463	0.23318	0.224212	0.00896775	0.0392125
464	0.21925	0.230798	-0.0115477	0.0513179
465	0.25549	0.243329	0.0121607	0.0487579
466	0.24701	0.260011	-0.0130007	0.0512826
467	0.26291	0.279694	-0.0167841	0.0618651
468	0.3167	0.301627	0.0150734	0.0487556
469	0.34158	0.325321	0.0162588	0.0487593
470	0.33294	0.350468	-0.0175279	0.0512954
471	0.39948	0.376876	0.0226037	0.0582301
472	0.4287	0.404435	0.0242653	0.0582506
473	0.4071	0.43309	-0.0259895	0.0618659
474	0.43968	0.462829	-0.0231495	0.0513002
475	0.52328	0.493669	0.029611	0.058235
476	0.49411	0.525649	-0.0315391	0.0618561
477	0.58676	0.558828	0.0279323	0.048765
478	0.56361	0.593283	-0.0296725	0.051297
479	0.66055	0.629103	0.0314467	0.0487677
480	0.69971	0.6664	0.0333103	0.0487667
481	0.66297	0.705296	-0.0423256	0.0618675
482	0.36712	0.38645	-0.01933	0.0513024
483	0.30712	0.292503	0.0146174	0.0487555
484	0.20952	0.220554	-0.0110341	0.0513124
485	0.18024	0.18776	-0.00751995	0.0408693
486	0.1825	0.173818	0.00868214	0.0487326
487	0.18205	0.17339	0.00866033	0.0487302
488	0.17226	0.18133	-0.00907015	0.0513032
489	0.18314	0.19484	-0.0117001	0.0619087
490	0.22265	0.212048	0.0106019	0.0487784
491	0.22252	0.231797	-0.00927714	0.0408399
492	0.26855	0.253354	0.0151957	0.0582317
493	0.25968	0.27626	-0.0165803	0.0618738
494	0.28522	0.300235	-0.0150149	0.051293
495	0.3121	0.325114	-0.0130143	0.0408475
496	0.37185	0.350807	0.0210432	0.0582384
497	0.35463	0.377274	-0.0226444	0.0618779
498	0.37215	0.404511	-0.0323612	0.0833342
499	0.3936	0.432536	-0.0389358	0.0942601
500	0.5029	0.461384	0.0415156	0.0861065
501	0.53039	0.491106	0.0392845	0.0769156
502	0.48001	0.52176	-0.0417496	0.0833517
503	0.59215	0.553415	0.0387348	0.0676256
504	0.54511	0.58615	-0.0410403	0.0725568
505	0.66345	0.620053	0.0433968	0.0676225
506	0.32996	0.308382	0.0215778	0.0676057
507	0.2045	0.224732	-0.0202323	0.0942719
508	0.17105	0.159862	0.0111878	0.0676179
509	0.14427	0.133586	0.0106838	0.0769014
510	0.11437	0.124319	-0.00994877	0.0833619
511	0.11841	0.127325	-0.00891483	0.0725565
512	0.14992	0.137544	0.0123764	0.0861078
513	0.16613	0.152417	0.0137132	0.0860983
514	0.15661	0.17023	-0.0136197	0.0833416
515	0.20515	0.189963	0.0151874	0.0768766
516	0.1941	0.210983	-0.0168831	0.0833561
517	0.25154	0.232916	0.0186236	0.0768846
518	0.23254	0.25554	-0.0229999	0.0942463
519	0.29824	0.278732	0.0195081	0.0676223
520	0.28126	0.302435	-0.0211753	0.0725559
521	0.30376	0.32663	-0.0228702	0.072559
522	0.3197	0.351324	-0.0316242	0.0942566
523	0.4029	0.376543	0.0263574	0.0676313
524	0.43852	0.40232	0.0362	0.0861044
525	0.39011	0.4287	-0.0385896	0.0942579
526	0.41927	0.455732	-0.0364618	0.0833411
527	0.43995	0.483467	-0.0435173	0.0942527
528	0.5478	0.511967	0.0358327	0.0676237
529	0.59	0.541293	0.0487069	0.0861084
530	0.28834	0.269485	0.0188546	0.0676002
531	0.19287	0.211947	-0.0190766	0.0942481
532	0.17358	0.159251	0.0143292	0.0861052
533	0.14818	0.138486	0.00969389	0.0676319
534	0.14139	0.13092	0.0104704	0.0769008
535	0.12169	0.133732	-0.0120423	0.0942934
536	0.13286	0.142862	-0.0100025	0.0725545
537	0.14536	0.156306	-0.0109464	0.0725727
538	0.1571	0.172645	-0.0155448	0.094284
539	0.20437	0.191008	0.0133621	0.0675917
540	0.22559	0.210836	0.0147539	0.0676123
541	0.25263	0.231778	0.0208521	0.0860932
542	0.27136	0.253614	0.0177459	0.0676067
543	0.25135	0.276215	-0.0248648	0.0942627
544	0.27854	0.299507	-0.0209666	0.072543
545	0.34609	0.323455	0.0226347	0.067612
546	0.31672	0.348054	-0.031334	0.0942696
547	0.40691	0.373313	0.0335974	0.0861225
548	0.43119	0.399254	0.0319355	0.0769119
549	0.39609	0.425914	-0.0298236	0.0725631
550	0.41252	0.453329	-0.0408093	0.0942643
551	0.44302	0.481552	-0.0385325	0.083352
552	0.46978	0.510636	-0.0408564	0.0833449
553	0.58929	0.540642	0.0486482	0.0861082
554	0.27253	0.296235	-0.0237051	0.0833564
555	0.2729	0.252686	0.0202144	0.0769216
556	0.22768	0.212789	0.0148915	0.0676165
557	0.18455	0.200605	-0.0160547	0.0833674
558	0.21639	0.200366	0.0160241	0.0768993
559	0.2283	0.209456	0.0188438	0.0860926
560	0.24457	0.224381	0.0201889	0.0861025
561	0.22142	0.243321	-0.0219014	0.0942522
562	0.24115	0.26501	-0.0238603	0.0942795
563	0.26557	0.288665	-0.0230946	0.0833388
564	0.34202	0.313786	0.0282341	0.0861049
565	0.30946	0.340072	-0.0306124	0.0942598
566	0.39306	0.367348	0.0257122	0.0676275
567	0.35992	0.395521	-0.0356011	0.0942524
568	0.38634	0.424559	-0.0382186	0.0942623
569	0.49082	0.454464	0.0363557	0.0769201
570	0.52409	0.485271	0.0388186	0.0769171
571	0.55839	0.517035	0.0413553	0.0769097
572	0.5993	0.549822	0.0494778	0.086114
573	0.54285	0.583718	-0.0408677	0.0725525
574	0.67451	0.618817	0.0556928	0.0861234
575	0.60281	0.65523	-0.0524201	0.0833361
576	0.63763	0.693077	-0.0554472	0.0833349
577	0.67389	0.732497	-0.058607	0.0833441
578	0.49855	0.46594	0.0326095	0.0676202
579	0.43088	0.398964	0.031916	0.0769204
580	0.31182	0.338935	-0.0271148	0.0833334
581	0.28403	0.308729	-0.0246995	0.0833373
582	0.27051	0.294033	-0.0235229	0.0833344
583	0.27111	0.291521	-0.0204111	0.0725559
584	0.27663	0.297454	-0.0208236	0.0725456
585	0.33436	0.309595	0.0247645	0.0769138
586	0.35572	0.326349	0.0293706	0.0861219
587	0.37784	0.346643	0.0311974	0.0861233
588	0.40302	0.369748	0.0332724	0.0861122
589	0.36751	0.395172	-0.0276625	0.0725399
590	0.45217	0.422595	0.0295748	0.0676176
591	0.42018	0.451813	-0.0316334	0.0725542
592	0.43926	0.482707	-0.0434467	0.0942479
593	0.55644	0.515223	0.0412169	0.0769214
594	0.5933	0.549357	0.0439431	0.0769139
595	0.6261	0.585143	0.0409569	0.067628
596	0.67868	0.622649	0.0560306	0.0861128
597	0.70831	0.661977	0.046333	0.0676253
598	0.65402	0.703254	-0.0492344	0.0725489
599	0.69437	0.746642	-0.0522721	0.0725491
600	0.73687	0.792335	-0.0554651	0.0725411
601	0.77331	0.840563	-0.0672528	0.0833434
602	0.59807	0.558947	0.0391233	0.0676279
603	0.51271	0.474735	0.0379753	0.0769162
604	0.37144	0.40375	-0.0323098	0.0833596
605	0.39392	0.364748	0.0291715	0.0769019
606	0.37496	0.344003	0.0309574	0.0861168
607	0.36431	0.337327	0.026983	0.0769143
608	0.3679	0.340657	0.0272433	0.0768979
609	0.32682	0.351422	-0.0246018	0.0725457
610	0.33837	0.3678	-0.0294304	0.0833523
611	0.36135	0.388553	-0.0272033	0.0725515
612	0.3798	0.412832	-0.0330318	0.0833471
613	0.47087	0.440066	0.0308044	0.0676324
614	0.43698	0.469878	-0.0328977	0.0725532
615	0.46689	0.502035	-0.0351446	0.0725435
616	0.48813	0.536407	-0.0482772	0.0942419
617	0.62451	0.572947	0.0515635	0.0861217
618	0.6606	0.611669	0.0489312	0.0769197
619	0.69832	0.652643	0.0456765	0.0676207
620	0.75167	0.695991	0.0556786	0.0769222
621	0.67511	0.741883	-0.066773	0.0942461
622	0.85377	0.790536	0.0632342	0.076913
623	0.90117	0.842223	0.0589465	0.0676227
624	0.96009	0.897284	0.0628058	0.0676286
625	1.03262	0.956131	0.0764888	0.0769214
626	0.58715	0.645223	-0.058073	0.0942459
627	0.57151	0.534128	0.0373815	0.0676198
628	0.41043	0.446126	-0.0356963	0.0833483
629	0.43044	0.394907	0.0355326	0.0861033
630	0.39883	0.365906	0.0329238	0.086105
631	0.32881	0.353564	-0.0247536	0.0725514
632	0.37777	0.353058	0.024712	0.0676275
633	0.39016	0.361265	0.0288948	0.0769065
634	0.40232	0.376002	0.0263184	0.0676286
635	0.42348	0.395781	0.0276987	0.0676187
636	0.38602	0.419591	-0.0335714	0.0833438
637	0.48249	0.44675	0.0357396	0.0769222
638	0.51495	0.476807	0.0381426	0.0769191
639	0.55533	0.509481	0.0458487	0.0861162
640	0.58818	0.544614	0.0435664	0.0769186
641	0.62871	0.58214	0.0465704	0.0769218
642	0.67805	0.622072	0.0559779	0.0861118
643	0.61797	0.664485	-0.0465153	0.072541
644	0.65275	0.709514	-0.0567645	0.0833384
645	0.81793	0.757351	0.0605793	0.0769124
646	0.74358	0.808246	-0.0646658	0.0833416
647	0.80214	0.862516	-0.0603762	0.072539
648	0.85611	0.920556	-0.0644463	0.0725474
649	0.91405	0.982852	-0.068802	0.0725414
650	0.58765	0.631892	-0.0442419	0.072555
651	0.52977	0.495115	0.0346546	0.0676264
652	0.35772	0.393099	-0.0353793	0.0942419
653	0.30793	0.334712	-0.026782	0.0833496
654	0.2749	0.302091	-0.0271915	0.0942527
655	0.26492	0.287961	-0.0230413	0.08335
656	0.26638	0.286432	-0.0200523	0.0725464
657	0.27324	0.293809	-0.0205686	0.072546
658	0.32911	0.307581	0.0215286	0.0676265
659	0.30326	0.326095	-0.0228349	0.072566
660	0.37261	0.348243	0.0243675	0.0676074
661	0.34342	0.373293	-0.0298734	0.0833622
662	0.37271	0.400768	-0.0280582	0.0725507
663	0.39163	0.430363	-0.0387334	0.0942426
664	0.42032	0.461898	-0.0415779	0.0942576
665	0.53985	0.495279	0.0445706	0.086116
666	0.48804	0.530483	-0.0424434	0.083343
667	0.5278	0.567537	-0.0397371	0.0725568
668	0.55192	0.606512	-0.0545917	0.0942511
669	0.60219	0.647517	-0.0453275	0.0725409
670	0.74595	0.690703	0.0552473	0.0769112
671	0.66999	0.736254	-0.0662645	0.0942432
672	0.7138	0.784401	-0.0706012	0.094248
673	0.9106	0.835421	0.0751794	0.0861151
674	0.45973	0.499714	-0.0399839	0.0833481
675	0.41377	0.383122	0.030648	0.0769188
676	0.31611	0.295437	0.0206727	0.0676078
677	0.27145	0.249039	0.0224112	0.0861161
678	0.20713	0.22515	-0.0180195	0.0833698
679	0.23257	0.217362	0.0152083	0.0676027
680	0.2356	0.22019	0.0154103	0.06762
681	0.2511	0.230368	0.0207317	0.0861189
682	0.22604	0.245702	-0.0196625	0.0833611
683	0.24094	0.264778	-0.0238376	0.0942723
684	0.26086	0.286666	-0.0258063	0.094265
685	0.33251	0.310764	0.0217459	0.0676099
686	0.36698	0.336685	0.0302946	0.0861051
687	0.33505	0.364189	-0.0291391	0.0833451
688	0.36561	0.393134	-0.0275243	0.0725523
689	0.38957	0.423449	-0.0338794	0.0833422
690	0.48697	0.455115	0.0318549	0.0676263
691	0.44421	0.488149	-0.0439389	0.0942532
692	0.56963	0.5226	0.0470298	0.0861169
693	0.60881	0.558544	0.0502661	0.0861198
694	0.6378	0.596079	0.0417209	0.0676256
695	0.6798	0.635327	0.0444725	0.0676322
696	0.73731	0.676434	0.0608761	0.0861205
697	0.65481	0.719573	-0.0647627	0.0942426
698	0.39221	0.421737	-0.0295271	0.0725529
699	0.30436	0.334469	-0.0301088	0.0942625
700	0.23971	0.263418	-0.0237082	0.0942433
701	0.2456	0.227408	0.0181919	0.07692
702	0.19282	0.209597	-0.0167775	0.0833834
703	0.18689	0.205375	-0.0184847	0.0942458
704	0.22703	0.210221	0.0168088	0.0768841
705	0.237	0.221498	0.0155016	0.0676192
706	0.25875	0.237389	0.0213615	0.086111
707	0.27724	0.256706	0.0205341	0.0769146
708	0.25358	0.278666	-0.0250859	0.0942642
709	0.32999	0.302751	0.0272389	0.0860982
710	0.29905	0.328628	-0.0295777	0.0942449
711	0.33115	0.356086	-0.0249359	0.0725686
712	0.4158	0.385003	0.0307969	0.0769149
713	0.38209	0.41532	-0.03323	0.0833448
714	0.41126	0.447023	-0.0357629	0.0833359
715	0.44172	0.480135	-0.0384145	0.0833418
716	0.56102	0.514706	0.0463139	0.0861072
717	0.58937	0.550814	0.0385562	0.0676316
718	0.54736	0.588559	-0.0411994	0.0725392
719	0.67831	0.628068	0.0502424	0.0769187
720	0.62262	0.669487	-0.0468667	0.072543
721	0.77003	0.712995	0.0570349	0.076917
722	0.39893	0.438386	-0.0394561	0.0942442
723	0.32941	0.361992	-0.0325817	0.0942483
724	0.27875	0.302989	-0.0242394	0.0833343
725	0.29591	0.27656	0.0193496	0.0676005
726	0.24327	0.267338	-0.024068	0.0942718
727	0.25181	0.270767	-0.0189574	0.0725534
728	0.26002	0.282631	-0.0226111	0.0833356
729	0.2734	0.30044	-0.0270404	0.0942437
730	0.34831	0.322513	0.0257972	0.0769121
731	0.37211	0.347769	0.0243407	0.0676245
732	0.40179	0.375511	0.0262787	0.0676152
733	0.37288	0.405306	-0.0324259	0.0833372
734	0.46747	0.436892	0.0305784	0.0676243
735	0.50774	0.47013	0.0376099	0.0769221
736	0.46961	0.504967	-0.0353572	0.072559
737	0.49268	0.541413	-0.0487333	0.0942533
738	0.62009	0.579525	0.0405645	0.0676293
739	0.67514	0.619402	0.0557381	0.0861124
740	0.70745	0.661176	0.0462743	0.0676215
741	0.65566	0.705014	-0.0493543	0.0725439
742	0.81872	0.751121	0.0675993	0.0861224
743	0.86371	0.799738	0.0639724	0.0769154
744	0.79157	0.851152	-0.059582	0.0725406
